1 PIKfyve/Fab1 is required for efficient V-  
2 ATPase delivery to phagosomes,  
3 phagosomal killing, and restriction of  
4 *Legionella* infection

---

5 Catherine M. Buckley<sup>1,2</sup>, Victoria L. Heath<sup>3</sup>, Aurélie Guého<sup>4</sup>, Stephen K. Dove<sup>5</sup>, Robert H. Michell<sup>5</sup>,  
6 Roger Meier<sup>6#</sup>, Hubert Hilbi<sup>7</sup>, Thierry Soldati<sup>4</sup>, Robert H. Insall<sup>8\*</sup> and Jason S. King<sup>1,2\*</sup>

7 <sup>1</sup> Centre for Membrane Interactions and Dynamics, Department of Biomedical Sciences, University of  
8 Sheffield, Firth Court, Western Bank, Sheffield. S10 2TN, UK

9 <sup>2</sup>Bateson Centre, University of Sheffield, Firth Court, Western Bank, Sheffield. S10 2TN, UK

10 <sup>3</sup>Institute of Cardiovascular Sciences, Institute for Biomedical Research, College of Medical and  
11 Dental Sciences, University of Birmingham, Edgbaston, Birmingham, B15 2TT, UK

12 <sup>4</sup>Department of Biochemistry, Faculty of Sciences, University of Geneva, CH-1211 Geneva,  
13 Switzerland

14 <sup>5</sup>School of Biosciences, University of Birmingham, Edgbaston, Birmingham. B15 2TT, UK

15 <sup>6</sup>Institute of Molecular Life Sciences, University of Zürich, CH-8057 Zürich, Switzerland

16 <sup>7</sup>Institute of Medical Microbiology, University of Zürich, CH-8006 Zürich, Switzerland

17 <sup>8</sup>CRUK Beatson Institute, Switchback Road, Bearsden, Glasgow G61 1BD, UK

18 <sup>#</sup>Present address: Scientific Center for Optical and Electron Microscopy, ETH Zürich, CH-8093 Zürich,  
19 Switzerland

20 \*To whom correspondence should be addressed:

21 [Jason.King@sheffield.ac.uk](mailto:Jason.King@sheffield.ac.uk)

22 [R.Insall@beatson.gla.ac.uk](mailto:R.Insall@beatson.gla.ac.uk)

## 23 Abstract

24 By engulfing potentially harmful microbes, professional phagocytes are continually at risk from  
25 intracellular pathogens. To avoid becoming infected, the host must kill pathogens within the  
26 phagosome before they can escape or establish a survival niche. Here, we analyse the role of the  
27 phosphoinositide (PI) 5-kinase PIKfyve in phagosome maturation and killing, using the amoeba and  
28 model phagocyte *Dictyostelium discoideum*.

29 By binding to phosphatidylinositol-3-phosphate (PI3P) and phosphorylating it to PI(3,5)P<sub>2</sub>, PIKfyve  
30 plays important, but poorly understood, roles in vesicular trafficking. Here we show that PIKfyve  
31 activity is essential during early phagosome maturation. Disruption of *PIKfyve* inhibited delivery of  
32 the vacuolar V-ATPase, dramatically reduced the ability of *Dictyostelium* cells to acidify newly-  
33 formed phagosomes. Consequently, *PIKfyve*-null cells were unable to digest phagosomal contents  
34 and generate an effective antimicrobial environment. PI(3,5)P<sub>2</sub> is therefore essential for phagocytes  
35 to efficiently kill captured bacteria and we demonstrate that cells lacking *PIKfyve* are more  
36 susceptible to infection by the intracellular pathogen *Legionella pneumophila*. We conclude that  
37 PIKfyve-catalysed PI(3,5)P<sub>2</sub> production plays a crucial and general role in ensuring early phagosomal  
38 maturation, thus protecting host cells from diverse pathogenic microbes.

## 39 Author summary

40 Cells that capture or eat bacteria must swiftly kill them to prevent potential pathogens surviving long  
41 enough to escape and establish an infection. This is achieved by the rapid delivery of components  
42 that produce an antimicrobial environment in the phagosome, the compartment containing the  
43 captured microbe. This is essential both for the function of immune cells and for amoebae that feed  
44 on bacteria in their environment. Here, we identify a new signalling pathway that regulates the  
45 delivery of antimicrobial components to the phagosome, and show that bacteria survive over three  
46 times as long within the host if this pathway is disabled. We show that this is of general importance  
47 for killing a wide range of pathogenic and non-pathogenic bacteria, and that it is physiologically  
48 important for cells to prevent infection by the opportunistic human pathogen *Legionella*.

## 49 Introduction

50 It is essential for professional phagocytes to kill their prey rapidly and efficiently to prevent the  
51 establishment of infections and disease. Multiple mechanisms are employed to achieve this and  
52 once phagosomes have been internalised they quickly become acidified and acquire reactive oxygen  
53 species, antimicrobial peptides and acid hydrolases. The timely and regulated delivery of these  
54 components is vital to protect the host from intracellular pathogens, but is incompletely understood.

55 After the phagosome is internalised, specific effector proteins are recruited to its cytoplasmic  
56 surface by interacting with several inositol phospholipids (PIPs) that play important roles in  
57 regulating vesicle trafficking and controlling maturation. The effectors of each PIP regulate particular  
58 aspects of compartment identity, membrane trafficking and endosomal maturation [1, 2].

59 Phosphatidylinositol-3-phosphate (PI(3)P), made by the class III PI 3-kinase VPS34, is one of the first  
60 PIPs to accumulate on vesicles after endocytosis, and it recruits proteins containing FYVE (Fab1,  
61 YOTB, Vac1 and EEA1) and PX domains – including, respectively, the characteristic early endosome  
62 markers EEA1 and Hrs, and sorting nexins [3, 4]. Also recruited to early endosomes by its FYVE  
63 domain is PIKfyve (known as Fab1 in yeast) [5], a phosphoinositide 5-kinase that phosphorylates  
64 PI(3)P to phosphatidylinositol-3,5-bisphosphate (PI(3,5)P<sub>2</sub>) [6-10]. The roles of PI(3)P are well  
65 explored, but the formation of PI(3,5)P<sub>2</sub> and the identities and functions of its various effector  
66 proteins are less well understood [11-13]. PI(3,5)P<sub>2</sub> is thought to accumulate predominantly on late  
67 endosomes, and disruption of PIKfyve activity leads to multiple endocytic defects, including gross  
68 endosomal enlargement and accumulation of autophagosomes [14-19]. Recent research has begun  
69 to reveal important physiological roles of PIKfyve in a range of cell types and animals although  
70 mechanistic details remain sparse [20-24].

71 Like classical endocytosis, phagosome maturation is regulated by PIPs [25]. Phagosomes accumulate  
72 PI(3)P immediately after closure, and this is required for their subsequent maturation [26-28]. The  
73 recent identification of several PIKfyve inhibitors, including apilimod and YM201636 [29, 30], has  
74 allowed researchers to demonstrate the importance of PI(3)P to PI(3,5)P<sub>2</sub> conversion for phagosomal  
75 maturation in macrophages [31, 32]. However, there are conflicting reports on the roles of PIKfyve  
76 during key maturation steps such as acidification and degradation of bacteria, and its functional role  
77 remains subject to much debate.

78 To understand the function and physiological significance of PIKfyve, we have investigated its role in  
79 phagosome maturation and pathogen killing in the model organism *Dictyostelium discoideum*, a soil-  
80 dwelling amoeba and professional phagocyte that feeds on bacteria. *Dictyostelium* PIPs are unusual,  
81 with the lipid chain joined to the *sn*-1-position of the glycerol backbone by an ether, rather than

82 ester, linkage: these PIPs should correctly be named as derivatives of plasmalyngol rather than  
83 phosphatidylinositol [33]. This however, appears to make no difference to downstream functions,  
84 which are dictated by interactions with the inositol polyphosphate headgroup. *Dictyostelium* has  
85 thus been an effective model for analysis of phosphoinositide signalling [34-37]. For convenience,  
86 both the mammalian and *Dictyostelium* inositol phospholipids are referred to as PIPs hereafter.

87 We find that genetic or pharmacological disruption of PIKfyve activity in *Dictyostelium* leads to a  
88 swollen endosomal phenotype reminiscent of defects in macrophages, and we provide a detailed  
89 analysis of phagosome maturation. We show that at least some of the defects in PIKfyve-deficient  
90 phagosome maturation are due to reduced recruitment of the proton-pumping vacuolar (V-ATPase).  
91 Furthermore, we provide the first demonstration that PIKfyve is required for the efficient killing of  
92 phagocytosed bacteria and for restricting the intracellular growth of the pathogen *Legionella*  
93 *pneumophila*.

94



## 95 Results

### 96 ***PIKfyve*- null cells have swollen endosomes**

97 The *Dictyostelium* genome contains a single orthologue of *PIKfyve* (*PIP5K3*). Like the mammalian and  
98 yeast proteins, *Dictyostelium* *PIKfyve* contains an N-terminal FYVE domain, a CCT (chaperonin  
99 Cpn60/TCP1)-like chaperone domain, a *PIKfyve*-unique cysteine/histidine-rich domain and a C-  
100 terminal PIP kinase domain [6]. In order to investigate the role of PI(3,5)P<sub>2</sub> in *Dictyostelium* we  
101 disrupted the *PIKfyve* gene by inserting a blasticidin resistance cassette and deleting a portion of the  
102 central *PIKfyve*-unique region (Supplementary Figure 1). To control for differences in genetic  
103 backgrounds, mutants were generated in both Ax3 and Ax2 axenic strains.

104 While the unusual ether-linked chemistry of the *Dictyostelium* inositol phospholipids prevented  
105 direct measurement of PI(3,5)P<sub>2</sub> loss by either the standard method of methanolysis followed by  
106 HPLC of deacylation products or mass spectrometry (P.T. Hawkins, personal communication), we  
107 found that each mutant strain was highly vacuolated (Figure 1A and B), resembling the swollen  
108 vesicle phenotype observed upon *PIKfyve* knockdown or inhibition in mammalian cells, *C. elegans*, *S.*  
109 *cerevisiae* and *D. melanogaster* [9, 14, 19, 38]. Identical results were also obtained with *PIKfyve*- cells  
110 generated in an Ax2 background and this effect was phenocopied by incubation with the *PIKfyve*-  
111 specific inhibitor apilimod [29], confirming that this phenotype was due to deficient PI(3,5)P<sub>2</sub>  
112 synthesis (Figure 1C).

113 When amoebae were hypotonically stressed in phosphate buffer, we observed a sustained increase  
114 in vacuolation for at least 5 hours. However, after 24 hours, when the cells became polarized  
115 (indicating the onset of starvation-induced development), *PIKfyve*- mutants became  
116 indistinguishable from the random integrant and parental controls (Figure 1B). This is most likely due  
117 to the well-documented suppression of fluid-phase uptake that occurs when *Dictyostelium* cells  
118 enter starvation-induced development [39, 40]. Consistent with this, *PIKfyve* null cells had no  
119 observable delay or other defects in development, and formed morphologically normal fruiting  
120 bodies with viable spores (Supplementary figure 2). Disruption of PI(3,5)P<sub>2</sub> synthesis therefore leads  
121 to endocytic defects, but it is not required for *Dictyostelium* development.

122 When amoebae were hypotonically stressed in phosphate buffer, we observed a sustained increase  
123 in vacuolation for at least 5 hours. However, after 24 hours, when the cells became polarized  
124 (indicating the onset of starvation-induced development), *PIKfyve*<sup>-</sup> mutants became  
125 indistinguishable from the random integrant and parental controls (Figure 1B). This is most likely due  
126 to the well-documented suppression of fluid-phase uptake that occurs when *Dictyostelium* cells  
127 enter starvation-induced development [39, 40]. Consistent with this, *PIKfyve*-null cells showed no

128 observable delay or other defects in development, and formed morphologically normal fruiting  
129 bodies with viable spores (Supplementary Figure 2). We conclude that loss of PIKfyve activity  
130 therefore leads to endocytic defects, but it is not required for *Dictyostelium* development.

### 131 **PIKfyve is important for phagocytic growth but not uptake**

132 Laboratory strains of *Dictyostelium* can obtain nutrients either by macropinocytosis of liquid (axenic)  
133 medium or by phagocytosis of bacteria. Whilst *PIKfyve*- null cells had normal rates of endocytosis  
134 and exocytosis, axenic growth was slower than for wild-type cells, with mutants doubling every 16  
135 hours compared to 10 hours for the controls (Figure 2A-C)..

136 In contrast, growth on bacteria was more strongly affected, and *PIKfyve* null cells formed much  
137 smaller colonies on lawns of avirulent *Klebsiella pneumoniae* (Figure 2D). To confirm this defect and  
138 test its generality, we screened *PIKfyve*-null cells for growth on a palette of diverse Gram-positive  
139 and Gram-negative bacteria, including both pathogenic and non-pathogenic strains. PIKfyve was  
140 required for efficient growth in all cases, indicating a general role for PI(3,5)P<sub>2</sub> synthesis for  
141 phagocytic growth (Figure 2E and F).

142 Defective growth on bacteria could be due to disruption of either capture, killing or digestion. To  
143 measure if phagocytic uptake was affected by PIKfyve disruption, we monitored the ability of  
144 *Dictyostelium* cells to reduce the turbidity of an *E. coli* suspension over time (Figure 3A). No  
145 difference was observed in the ability of *PIKfyve* null cells to phagocytose bacteria compared to the  
146 parental strain. To confirm this, we also measured phagocytosis of fluorescent beads (Figure 3B) and  
147 GFP-expressing *Mycobacterium smegmatis* (Figure 3C) by flow cytometry and found no defect in  
148 uptake by *PIKfyve* null cells. As bacteria are efficiently captured, PIKfyve must therefore be  
149 important for phagosome processing.

### 150 **PIKfyve does not regulate PI(3)P dynamics in *Dictyostelium***

151 PI(3)P is one of the best characterized early markers of maturing endosomes and phagosomes. In  
152 both mammalian macrophages and in *Dictyostelium*. Immediately following particle internalization,  
153 PI(3)P is generated on the phagosome by the class III PI 3-kinase VPS34 [26, 32, 41] and interacts  
154 with a number of important regulators of maturation such as Rab5 [42]. PIKfyve is both recruited by  
155 PI(3)P and phosphorylates it, forming PI(3,5)P<sub>2</sub>. Absence of *PIKfyve* could perturb phagosome  
156 maturation by reducing PI(3)P consumption, by eliminating the actions of PI(3,5)P<sub>2</sub>, or both. Indeed,  
157 studies in macrophages indicate that inhibition of PIKfyve can cause prolonged PI(3)P signalling [32].

158 We therefore investigated the contribution of PIKfyve to PI(3)P dynamics in *Dictyostelium*. PI(3)P can  
159 be visualized in cells using the well-characterised reporter GFP-2xFYVE [34, 43]. Expression of GFP-  
160 2xFYVE in control cells demonstrated PI(3)P is present on *Dictyostelium* phagosomes following  
161 engulfment, consistent with previous reports [41] (Figure 4A). However, we found defects in neither  
162 initial recruitment, nor dissociation of this reporter in *PIKfyve* mutants (Figure 4A and B). Therefore,  
163 PIKfyve activity does not significantly contribute to PI(3)P turnover in these cells. The defects in  
164 growth, and the swollen endosomes are thus due to lack of PI(3,5)P<sub>2</sub> synthesis rather than prolonged  
165 accumulation of PI(3)P.

### 166 ***PIKfyve* deficient phagosomes have defective acidification and digestion**

167 Next we investigated how absence of PIKfyve affects phagosomal maturation. One of the first stages  
168 of maturation is the acquisition of the proton-pumping V-ATPase, leading to rapid acidification [44].  
169 The influence of PIKfyve on endosomal pH regulation, however, remains controversial. Whilst  
170 studies in *C. elegans*, plants and mammalian epithelial cells have shown that PIKfyve is required for  
171 efficient acidification [38, 45-48], others have shown that RAW 264.7 macrophages are still able to  
172 acidify their phagosomes to at least pH 5.5 when PIKfyve is inhibited [32].

173 We therefore assessed the ability of *Dictyostelium* *PIKfyve*-null cells to acidify their phagosomes by  
174 measuring the relative fluorescence of beads labelled with both the pH-sensitive FITC and the pH-  
175 insensitive Alexa 594 succinimidyl ester [49]. The phagosomes of *PIKfyve*-null cells acidified much  
176 more slowly than wild-type cells and never achieved as low a pH as those of wild-type cells (Figure  
177 4C).

178 Proper degradation of internalised material requires both acidification and the presence of  
179 proteases. We measured phagosomal proteolysis by following the increase in fluorescence due to  
180 the cleavage and unquenching of DQ-BSA coupled to beads [49] (Figure 4D). Strikingly, phagosomes  
181 of *PIKfyve*-null cells exhibited an almost complete loss of proteolytic activity, likely due to a  
182 combination of delayed delivery of hydrolytic enzymes and their lower activity in inadequately  
183 acidified phagosomes.

184 Phagosomal acidification is driven by the rapid recruitment and activity of the V-ATPase. The V-  
185 ATPase consists of V<sub>0</sub> (transmembrane) and V<sub>1</sub> (peripheral) sub-complexes. It has previously been  
186 shown that PI(3,5)P<sub>2</sub> can regulate V<sub>0</sub>-V<sub>1</sub> assembly at the yeast vacuole allowing dynamic regulation of  
187 activity [50]. To differentiate between defective V-ATPase delivery and assembly we expressed GFP-  
188 fusions of both V<sub>0</sub> and V<sub>1</sub> subunits (GFP-VatM and VatB-GFP respectively) and observed their  
189 recruitment to nascent phagosomes by fluorescence microscopy [51]. Both proteins were expressed

190 equally in wild-type and mutant cells (Supplementary figure 3) and by observing phagocytosis of pH-  
191 sensitive pHrodo-labelled yeast we were also able to simultaneously monitor acidification.

192 Both GFP-VatM and VatB-GFP began accumulating on phagosomes immediately following  
193 internalisation both in *PIKfyve*<sup>-</sup> and control cells, but the rate of accumulation was substantially  
194 reduced in the mutants and only reached about half of the final levels observed in wild-type cells  
195 (Figure 5A-D). Defective acidification was again demonstrated by a reduced increase in pHrodo  
196 fluorescence (Figure 5E). It should be noted that expression of VatB-GFP (but not GFP-VatM) caused  
197 a partial, but dominant, inhibition of acidification in this assay (Supplementary Figure 3A). The  
198 observation that both V-ATPase components were equally affected indicates that *PIKfyve* is required  
199 for delivery of the entire V-ATPase to the phagosome, rather than specifically affecting V<sub>0</sub>-V<sub>1</sub>  
200 association.

### 201 ***PIKfyve* is essential for efficient killing of bacteria**

202 Acidification and proteolysis are important mechanisms used by phagocytes to kill engulfed  
203 microbes. We therefore asked whether *PIKfyve* was physiologically important for killing. Bacterial  
204 death leads to membrane permeabilisation and intracellular acidification, so survival time within  
205 phagosomes can be inferred by observing the phagocytosis and subsequent quenching of GFP  
206 expressed by a non-pathogenic *Klebsiella pneumoniae* strain [52]. In this assay, the phagocytised  
207 bacteria survived for more than three times longer in *PIKfyve*<sup>-</sup> cells (median survival 12 min) than in  
208 wild-type cells (3.5 min) (Figure 6A and B). These benign bacteria did however eventually die in  
209 *PIKfyve* null cells, indicating either that the residual acidification is eventually sufficient, or other  
210 elements of the complex bacterial killing machinery remain functional in the *PIKfyve*<sup>-</sup> phagosomes.

### 211 ***PIKfyve* activity restricts the persistence of *Legionella* infection**

212 Many pathogenic bacteria infect host immune cells by manipulating phagosome maturation to  
213 establish a replication-permissive niche or to escape into the cytosol. To avoid such infection, host  
214 cells must kill such pathogens rapidly. *PIKfyve* may therefore be critical to protect host cells from  
215 infections.

216 *Legionella pneumophila* is a Gram-negative opportunistic human pathogen that normally lives in the  
217 environment by establishing replicative niches inside amoebae such as *Acanthamoeba*. This process  
218 can be replicated in the laboratory using *Dictyostelium* as an experimental host [53]. Following its  
219 phagocytosis, *Legionella* can disrupt normal phagosomal maturation and form a unique *Legionella*-  
220 containing vacuole (LCV). This requires the *Icm/Dot* (Intracellular multiplication/defective for

221 organelle trafficking) type IV secretion system that delivers a large number of bacterial effector  
222 proteins into the host (reviewed in [54]). These effectors modify many host signalling and trafficking  
223 pathways, one of which is to prevent the nascent *Legionella* phagosome from fusing with lysosomes  
224 [55].

225 Phosphoinositide signalling is heavily implicated in *Legionella* pathogenesis. *Legionella*-containing  
226 phagosomes rapidly accumulate PI(3)P. Its concentration then declines within 2 hours and PI(4)P  
227 accumulates [56], and some of the effectors introduced through the Icm/Dot system bind PI(3)P or  
228 PI(4)P [57-63]. The role of PI(3,5)P<sub>2</sub> in *Legionella* infection however is yet to be investigated. We  
229 therefore tested whether PIKfyve was beneficial, or detrimental for the host to control *Legionella*  
230 infection.

231 When we monitored the initial phase of infection, we found that both parental and *PIKfyve*<sup>-</sup>  
232 *Dictyostelium* phagocytised many more of the virulent wild-type *L. pneumophila* strain (JR32) than  
233 an avirulent strain that is defective in type IV secretion ( $\Delta icmT$ ) [64] (Figure 7A). These results are in  
234 agreement with the previous finding that expression of the Icm/Dot T4SS promotes uptake of *L.*  
235 *pneumophila* [65]. To compensate for this difference in bacterial uptake, subsequent experiments  
236 employed a multiplicity of infection (MOI) of 100 for the  $\Delta icmT$  strain, and an MOI of 1 for the wild-  
237 type JR32.

238 We next investigated whether *L. pneumophila* continue to multiply in, or are killed by, their  
239 *Dictyostelium* hosts over several days. When viable bacteria released from the infected cells were  
240 measured, both parental and *PIKfyve*<sup>-</sup> *Dictyostelium* almost eliminated the burden of avirulent  $\Delta icmT$   
241 *Legionella* during the 6 days following infection (Fig 7B, note that the CFUs scales in Figs. 7B and 7C  
242 are logarithmic). This was confirmed by observing a similar decline in the number of viable  
243 intracellular bacteria that were released when the amoebae were lysed (Figure 7C).

244 However, the results with wild-type *Legionella* were very different: many more survived in *PIKfyve*<sup>-</sup>  
245 than in wild-type amoebae (Figure 7C) and were released into the medium in larger numbers (Figure  
246 7B). Further confirmation of the enhanced survival of *Legionella* in *PIKfyve*<sup>-</sup> amoebae was obtained  
247 by flow cytometric analysis of the bacterial load within *Dictyostelium* cells infected with GFP-  
248 expressing *Legionella* (either wild-type or  $\Delta icmT$ ). The only *Dictyostelium* cells that accumulated  
249 substantial GFP fluorescent over several days were those infected by wild-type *Legionella*, and this  
250 happened sooner and to a greater degree in the *PIKfyve*-null cells (Figure 7D, central panels).

251

252 Manipulation of PIKfyve-mediated signalling is therefore not required for *L. pneumophila* to pervert  
253 phagosome maturation and replicate intracellularly. Rather, the role of PIKfyve in ensuring rapid  
254 phagosomal acidification and digestion is crucial to prevent *Legionella*, and presumably other  
255 pathogens, from surviving and establishing a permissive niche.

256

## 257 Discussion

258 In this study, we have characterised the role of PIKfyve during phagosome maturation using the  
259 model phagocyte *D. discoideum*. The roles of PI 3-kinases and PI(3)P signalling during phagosome  
260 formation and early maturation have been studied extensively, but the subsequent actions of  
261 PIKfyve and roles of PI(3,5)P<sub>2</sub> and PI(5)P are less well understood [2, 25]. In non-phagocytic cells such  
262 as fibroblasts and yeast, PI(3,5)P<sub>2</sub> production is important for endosomal fission and fragmentation  
263 of endolysosomal compartments [9, 17, 38, 46]. PIKfyve has also been shown to regulate  
264 macropinosome maturation, and be functionally important for intracellular replication of both the  
265 Vaccinia virus and *Salmonella* [47, 66, 67]. In this paper we show that PIKfyve is critical to ensure  
266 efficient phagosomal acidification and proteolysis, and demonstrate its physiological importance in  
267 the killing of bacteria and in suppression of intracellular pathogen survival.

268 Complex effects of PIKfyve inhibition on PIP-mediated signalling have hampered clear interpretation  
269 of PIKfyve function in some mammalian studies. For example, some studies report that disruption of  
270 PIKfyve prolonged PI(3)P-mediated signalling in addition to lack of PI(3,5)P<sub>2</sub> production [29, 31],  
271 making it difficult to determine which phosphoinositide change is responsible for the observed  
272 phenotypes. However, in agreement with other reports [17, 46], we found that deletion of PIKfyve  
273 had no impact on phagosomal PI(3)P dynamics in *Dictyostelium*. The observed defects in phagosome  
274 maturation appear therefore to be due to lack of PI(3,5)P<sub>2</sub> formation and not prolonged PI(3)P  
275 signalling in this system.

276 The role of PIKfyve in lysosomal acidification and degradation is currently disputed. Several studies  
277 which have measured vesicular pH at a single time point have shown that PIKfyve is required for  
278 acidification [9, 38, 46, 48], but others found that disruption of PIKfyve had little effect on  
279 phagosomal pH [32, 67, 68]. In contrast, we followed the temporal dynamics of V-ATPase delivery  
280 and of phagosomal acidification and proteolysis, and showed that V-ATPase delivery to PIKfyve-  
281 deficient phagosomes was substantially decreased and delayed, with consequent defects on initial  
282 acidification and proteolysis. PI(3,5)P<sub>2</sub> has also been proposed to regulate V-ATPase V<sub>0</sub>-V<sub>1</sub>  
283 subcomplex association dynamically at the yeast vacuole [50], but we found no evidence for this  
284 during *Dictyostelium* phagosome maturation.

285 It is still not clear how PIKfyve-generated PI(3,5)P<sub>2</sub> regulates V-ATPase trafficking, and few PI(3,5)P<sub>2</sub>  
286 effectors are known. One of these is the lysosomal cation channel TRPML1/mucopolin, which is  
287 specifically activated by PI(3,5)P<sub>2</sub> [69]. This interaction was recently shown to underlie the role of  
288 PIKfyve in macropinosome fragmentation, although not acidification [67], and TRPML1 is also  
289 required for phagosome-lysosome fusion [70]. Additionally, PI(3,5)P<sub>2</sub> and TRPML1 have been

290 proposed to mediate interactions between lysosomes and microtubules [71]. Therefore PIKfyve may  
291 drive V-ATPase delivery to phagosomes by both microtubule-directed trafficking and by regulating  
292 fission. However the sole mucolipin orthologue in *Dictyostelium* is only recruited to phagosomes  
293 much later, during their post-lysosomal phase, and its disruption influences exocytosis rather than  
294 acidification [72].

295 Rapid phagosomal acidification and proteolysis is key for phagocytes to kill internalised bacteria.  
296 Many clinically relevant opportunistic pathogens, such as *L. pneumophila* [54, 73], *Burkholderia*  
297 *cenoecepacia* [74] and *Cryptococcus neoformans* [75] have developed the ability to subvert normal  
298 phagosome maturation in order to maintain a permissive niche inside host phagocytes. This is likely  
299 to have evolved from interactions with their environmental predators such as amoebae [76-78].

300 *L. pneumophila* are phagocytosed in the lung by alveolar macrophages, and after internalisation  
301 employ effectors secreted via its type IV secretion system, some of which interfere with PI(3)P-  
302 signalling, to inhibit phagosome maturation [58, 79, 80]. We have shown that the lipid products of  
303 PIKfyve are not required for *L. pneumophila* to establish an intracellular replication niche. Rather, *L.*  
304 *pneumophila* survive much better in PIKfyve-deficient cells, suggesting that PI(3,5)P<sub>2</sub> helps  
305 *Dictyostelium* to eliminate, rather than harbour, *Legionella*. This is in contrast to the non-phagocytic  
306 invasion of epithelia that occurs during *Salmonella* infection when PIKfyve activity is necessary to  
307 promote the generation of a specialised survival niche within which the bacteria replicate [47].  
308 *Salmonella* has therefore evolved a specialised role for the products of PIKfyve in generating a  
309 survival niche, whereas *Legionella* and other bacteria are suppressed by PIKfyve-driven rapid  
310 phagosomal maturation.

311 The molecular arms race between host and pathogens is complex and hugely important. The very  
312 early events of phagosome maturation are critical in this competition; host cells aim to kill their prey  
313 swiftly whilst pathogens try to survive long enough to escape. Although its molecular effectors  
314 remain unclear, PIKfyve and its products are crucial to tip the balance in favour of the host, providing  
315 a general mechanism to ensure efficient antimicrobial activity.



## 316 Materials and Methods

### 317 Cell strains and culture

318 *Dictyostelium discoideum* cells were grown in adherent culture in plastic Petri dishes in HL5 medium  
319 (Formedium) at 22°C. *PIKfyve* null mutants were generated in both Ax2 and Ax3 backgrounds, with  
320 appropriate wild-type controls used in each case. Cells were transformed by electroporation and  
321 transformants selected in 20 µg/ml hygromycin (Invitrogen) or 10 µg/ml G418 (Sigma). Apilimod was  
322 from United States Biological.

323 Growth in liquid culture was measured by seeding log phase cells in a 6 well plate and counting cells  
324 every 12 hours using a haemocytometer. Growth on bacteria was determined by plating ~10  
325 *Dictyostelium* cells on SM agar plates (Formedium) spread with a lawn of *K. pneumophila*.

326 Plaque assays were performed as previously described [81]. Briefly, serial dilution of *Dictyostelium*  
327 cells ( $10^{-10}$ ) were placed on bacterial lawns and grown until visible colonies were obtained. The  
328 bacterial strains were kindly provided by Pierre Cosson and were: *K. pneumoniae* laboratory strain  
329 and 52145 isogenic mutant (Benghezal et al., 2006), the isogenic *P. aeruginosa* strains PT5 and  
330 PT531 (*rhIR-lasR* avirulent mutant) (Cosson et al., 2002), *E. coli* DH5α (Fisher Scientific), *E. coli* B/r  
331 (Gerisch, 1959), non-sporulating *B. subtilis* 36.1 (Ratner and Newell, 1978), and *M. luteus*  
332 (Wilczynska and Fisher, 1994). An avirulent strain of *K. pneumophila* was obtained from ATCC (Strain  
333 no. 51697).

334 The *Dictyostelium* development was performed by spreading  $10^7$  amoebae on nitrocellulose filters  
335 (47 mm Millipore) on top of absorbent discs pre-soaked in KK2 (0.1 M potassium phosphate pH 6.1)  
336 and images were taken at 20 hours [82].

### 337 Gene disruption and molecular biology

338 *PIKfyve* null cells in an Ax2 background were generated by gene disruption using homologous  
339 recombination. A blasticidin knockout cassette was made by amplifying a 5' flanking sequence of the  
340 *PIKfyve* gene (DDB\_G0279149) (primers: fw- GGTAGATGTTTAGGTGGTGAAGT, rv-  
341 gatagctctgctactgaagCGAGTGGTGAATTCATAAAGG) and 3' flanking sequence (primers: fw-  
342 ctactggagatccaagctgCCATTCAAGATAGACCAACCAATAG, rv- AGAATCAGAATAAACATCACCACC). These  
343 primers contained cross over sequences (in lower case) allowing a LoxP-flanked blasticidin resistance  
344 cassette (from pDM1079, a kind gift from Douwe Veltman) to be inserted between the two arms.

345 For *PIKfyve* gene disruption in an Ax3 background a knockout cassette was constructed in  
346 pBluescript by sequentially cloning fragment I (amplified by  
347 TAGTAGGAGCTCGGATCCGGTAGATGTTTAGGTGGTGAAGTTTTACCAAC and

348 TAGTAGTCTAGACGAGTGGTGAATTCATAAAGGTACGTTTCAT) and fragment II (amplified by  
349 TAGTAGAAGCTTCCATTCAAGATAGACCAACCAATAGTAGTCCTGC and  
350 TAGTAGGGTACCGGATCCCAGTGTGTAATGAGAATCAGAATAAACATCACC). The blasticidin resistance  
351 gene was inserted between fragment I and II as a XbaI – HindIII fragment derived from pBSR $\delta$ Bam  
352 [83]. Both constructs were linearised, electroporated into cells and colonies were screened by PCR.  
353 GFP-2xFYVE was expressed using pJSK489 [34], GFP-PH<sub>CRAC</sub> with pDM631 [84] and GFP-VatM and  
354 VatB-GFP with pMJC25 and pMJC31, respectively [85].

### 355 Microscopy and image analysis

356 Fluorescence microscopy was performed on a Perkin-Elmer Ultraview VoX spinning disk confocal  
357 microscope running on an Olympus 1x81 body with an UplanSApo 60x oil immersion objective (NA  
358 1.4). Images were captured on a Hamamatsu C9100-50 EM-CCD camera using Volocity software by  
359 illuminating cells with 488 nm and 594 nm laser lines. Quantification was performed using Image J  
360 (<https://imagej.nih.gov>).

361 To image PI(3)P dynamics, cells were incubated in HL5 medium at 4 °C for 5 mins before addition of  
362 10  $\mu$ l of washed 3  $\mu$ m latex beads (Sigma) and centrifugation at 280 x *g* for 10 seconds in glass-  
363 bottomed dishes (Mat-Tek). Dishes were removed from ice and incubated at room temperature for  
364 5 mins before imaging. Images were taken every 30 s across 3 fields of view for up to 30 mins.

365 V-ATPase recruitment and acidification was performed using *Saccharomyces cerevisiae* labelled with  
366 pHrodo red (Life Technologies) as per the manufacturers instructions. *Dictyostelium* cells in HL5  
367 medium were incubated with  $1 \times 10^7$  yeast per 3 cm dish, and allowed to settle for 10 mins before the  
368 medium was removed and cells were gently compressed under a 1% agarose/HL5 disk. Images were  
369 taken every 10 s across 3 fields of view for up to 20 mins. Yeast particles were identified using the  
370 “analyse particles” plugin and mean fluorescence measured over time. V-ATPase recruitment was  
371 measured as the mean fluorescence within a 0.5  $\mu$ m wide ring selection around the yeast. The signal  
372 was then normalised to the initial fluorescence after yeast internalisation for each cell.

### 373 Endocytosis and exocytosis

374 To measure endocytosis, *Dictyostelium* at  $5 \times 10^6$  cells/ml were shaken at 180 rpm. for 15 mins in  
375 HL5 before addition of 100 mg/ml FITC dextran (molecular mass, 70 kDa; Sigma). At each time point  
376 500  $\mu$ l of cell suspension were added to 1 ml ice-cold KK2 on ice. Cells were pelleted at 800 x *g* for 2  
377 mins and washed once in KK2. The pellet was lysed in 50 mM Na<sub>2</sub>HPO<sub>4</sub> pH 9.3 0.2% Triton X-100 and  
378 measured in a fluorimeter. To measure exocytosis, cells were prepared as above and incubated in 2  
379 mg/ml FITC-dextran overnight. Cells were pelleted, washed twice in HL5 and resuspended in HL5 at 5

380  $\times 10^6$  cells/ml. 500  $\mu$ l of cell suspension were taken for each time point and treated as described  
381 above.

### 382 Phagocytosis and phagosomal activity assays

383 Phagocytosis of *E. coli* was monitored by the decrease in turbidity of the bacterial suspension of over  
384 time as described [86]. An equal volume of  $2 \times 10^7$  *Dictyostelium* cells was added to a bacterial  
385 suspension with an OD<sub>600 nm</sub> of 0.8, shaking at 180 rpm, and the decrease in OD<sub>600 nm</sub> was recorded  
386 over time. Phagocytosis of GFP-expressing *M. smegmatis* and 1  $\mu$ m YG-carboxylated polystyrene  
387 beads (Polysciences Inc.) was previously described [49, 87].  $2 \times 10^6$  *Dictyostelium*/ml were shaken for  
388 2 hours at 150 rpm. Either 1  $\mu$ m beads (at a ratio of 200:1) or *M. smegmatis* (MOI 100) were added,  
389 500  $\mu$ l aliquots of cells were taken at each time point and fluorescence was measured by flow  
390 cytometry [49].

391 Phagosomal pH and proteolytic activity were measured by feeding cells either FITC/TRITC or  
392 DQgreen- BSA/Alexa 594-labelled 3  $\mu$ m silica beads (Kisker Biotech) [49]. Briefly, cells were seeded in  
393 a 96 well plate before addition of beads, and fluorescence measured on a plate reader over time. pH  
394 values were determined by the ratio of FITC to TRITC fluorescence using a calibration curve, and  
395 relative proteolysis was normalised to Alexa594 fluorescence.

### 396 Bacteria killing assay

397 Killing of GFP-expressing *K. aerogenes* was measured as previously described [52]. Briefly, 10  $\mu$ l of an  
398 overnight culture of bacteria in 280  $\mu$ l HL5 was placed in a glass-bottomed dish and allowed to settle  
399 before careful addition of 1.5 ml of a *Dictyostelium* cell suspension at  $1 \times 10^6$  cells/ml. Images were  
400 taken every 20 s for 40 min at 20x magnification. Survival time was determined by how long the GFP-  
401 fluorescence persisted after phagocytosis.

### 402 Western blotting

403 Ax2 or *PIKfyve* null cells expressing GFP-VatM or VatB-GFP were analysed by SDS-PAGE and Western  
404 blots using a rabbit anti-GFP primary antibody (gift from A. Peden) and a fluorescently conjugated  
405 anti-rabbit 800 secondary antibody, using standard techniques. The endogenous biotinylated  
406 mitochondrial protein MCCC1 was used as a loading control using Alexa680-conjugated Streptavidin  
407 (Life Technologies) [88].

### 408 Legionella infection assays

409 The following *L. pneumophila* Philadelphia-1 strains were used: virulent JR32 [89], the isogenic  $\Delta$ *lcmT*  
410 deletion mutant GS3011 lacking a functional *lcm*/Dot type 4 secretion system [64], and  
411 corresponding strains constitutively producing GFP [65]. *L. pneumophila* was grown for 3 d on

412 charcoal yeast extract (CYE) agar plates, buffered with *N*-(2-acetamido)-2-aminoethane-sulfonic acid  
413 (ACES) [90]. For infections, liquid cultures were inoculated in AYE medium at an OD<sub>600</sub> of 0.1 and  
414 grown for 21 h at 37 °C (post-exponential growth phase). To maintain plasmids, chloramphenicol  
415 was added at 5 µg/ml.

416 Uptake by *D. discoideum*, intracellular replication or killing of GFP-producing *L. pneumophila* was  
417 analyzed by flow cytometry as described [62]. Exponentially growing amoebae were seeded onto a  
418 24-well plate (5 × 10<sup>5</sup> cells/ml HL5 medium per well) and allowed to adhere for 1–2 h. *L.*  
419 *pneumophila* grown for 21 h in AYE medium was diluted in HL5 medium and used to infect the  
420 amoebae at an MOI of 100 or at the MOI indicated. The infection was synchronized by centrifugation  
421 (10 min, 880 g), infected cells were incubated at 25 °C and, 30 min post-infection, extracellular  
422 bacteria were removed by washing three to five times with SorC (2 mM Na<sub>2</sub>HPO<sub>4</sub>, 15 mM KH<sub>2</sub>PO<sub>4</sub>, 50  
423 µM CaCl<sub>2</sub>, pH 6.0). Infected amoebae were detached by vigorously pipetting, and 2 × 10<sup>4</sup> amoebae  
424 per sample were analyzed using a FACSCalibur flow cytometer (Becton Dickinson). The GFP  
425 fluorescence intensity falling into a *Dictyostelium* scatter gate was quantified using FlowJo software  
426 (Treestar, <http://www.treestar.com>).

427 Alternatively, intracellular replication of *L. pneumophila* in *D. discoideum* was quantified by  
428 determining colony forming units (CFU) in the supernatant as described [62, 91]. Exponentially  
429 growing amoebae were washed with SorC and resuspended in MB medium (7 g of yeast extract, 14 g  
430 of thiotone E peptone, 20 mM MES in 1 l of H<sub>2</sub>O, pH 6.9). Amoebae (1 × 10<sup>5</sup> cells per well) were  
431 seeded onto a 96-well plate, allowed to adhere for 1–2 h, and infected at an MOI of 1 with *L.*  
432 *pneumophila* grown in AYE medium for 21 h and diluted in MB medium. The infection was  
433 synchronized by centrifugation, and the infected amoebae were incubated at 25 °C. At the time  
434 points indicated, the number of bacteria released into the supernatant was quantified by plating  
435 aliquots (10–20 µl) of appropriate dilutions on CYE plates. Intracellular bacteria were also quantified  
436 by counting CFU after lysis of the infected amoebae with saponin. At the time points indicated, MB  
437 medium was replaced by 100 µl of 0.8% saponin and incubated for 15 min. The infected cells were  
438 lysed by pipetting, and aliquots were plated.

439

## 440 Acknowledgments

441 The authors would like to thank Steve Dove for many helpful suggestions and comments, as well as  
442 Phill Hawkins for his endeavours to separate *Dictyostelium* PIP<sub>2</sub>S.

443 References

- 444 1. Di Paolo G, De Camilli P. Phosphoinositides in cell regulation and membrane dynamics.  
445 Nature. 2006;443(7112):651-7. doi: 10.1038/nature05185. PubMed PMID: 17035995.
- 446 2. Levin R, Grinstein S, Schlam D. Phosphoinositides in phagocytosis and macropinocytosis.  
447 Biochim Biophys Acta. 2015;1851(6):805-23. doi: 10.1016/j.bbaliip.2014.09.005. PubMed PMID:  
448 25238964.
- 449 3. Gaullier JM, Simonsen A, D'Arrigo A, Bremnes B, Stenmark H, Aasland R. FYVE fingers bind  
450 PtdIns(3)P. Nature. 1998;394(6692):432-3. doi: 10.1038/28767. PubMed PMID: 9697764.
- 451 4. Raiborg C, Bremnes B, Mehlum A, Gillooly DJ, D'Arrigo A, Stang E, et al. FYVE and coiled-coil  
452 domains determine the specific localisation of Hrs to early endosomes. J Cell Sci. 2001;114(Pt  
453 12):2255-63. PubMed PMID: 11493665.
- 454 5. Cabezas A, Pattni K, Stenmark H. Cloning and subcellular localization of a human  
455 phosphatidylinositol 3-phosphate 5-kinase, PIKfyve/Fab1. Gene. 2006;371(1):34-41. doi:  
456 10.1016/j.gene.2005.11.009. PubMed PMID: 16448788.
- 457 6. Michell RH, Heath VL, Lemmon MA, Dove SK. Phosphatidylinositol 3,5-bisphosphate:  
458 metabolism and cellular functions. Trends Biochem Sci. 2006;31(1):52-63. doi:  
459 10.1016/j.tibs.2005.11.013. PubMed PMID: 16364647.
- 460 7. Sbrissa D, Ikononov OC, Shisheva A. PIKfyve, a mammalian ortholog of yeast Fab1p lipid  
461 kinase, synthesizes 5-phosphoinositides. Effect of insulin. J Biol Chem. 1999;274(31):21589-97.  
462 PubMed PMID: 10419465.
- 463 8. Zolov SN, Bridges D, Zhang Y, Lee WW, Riehle E, Verma R, et al. In vivo, Pikfyve generates  
464 PI(3,5)P2, which serves as both a signaling lipid and the major precursor for PI5P. Proc Natl Acad Sci  
465 U S A. 2012;109(43):17472-7. doi: 10.1073/pnas.1203106109. PubMed PMID: 23047693; PubMed  
466 Central PMCID: PMC3491506.
- 467 9. Yamamoto A, DeWald DB, Boronenkov IV, Anderson RA, Emr SD, Koshland D. Novel PI(4)P 5-  
468 kinase homologue, Fab1p, essential for normal vacuole function and morphology in yeast. Mol Biol  
469 Cell. 1995;6(5):525-39. PubMed PMID: 7663021; PubMed Central PMCID: PMC301213.
- 470 10. Takasuga S, Sasaki T. Phosphatidylinositol-3,5-bisphosphate: metabolism and physiological  
471 functions. J Biochem. 2013;154(3):211-8. doi: 10.1093/jb/mvt064. PubMed PMID: 23857703.
- 472 11. McCartney AJ, Zhang Y, Weisman LS. Phosphatidylinositol 3,5-bisphosphate: low abundance,  
473 high significance. BioEssays : news and reviews in molecular, cellular and developmental biology.  
474 2014;36(1):52-64. doi: 10.1002/bies.201300012. PubMed PMID: 24323921; PubMed Central PMCID:  
475 PMC3906640.
- 476 12. Ho CY, Alghamdi TA, Botelho RJ. Phosphatidylinositol-3,5-bisphosphate: no longer the poor  
477 PIP2. Traffic. 2012;13(1):1-8. doi: 10.1111/j.1600-0854.2011.01246.x. PubMed PMID: 21736686.
- 478 13. Michell RH. Inositol lipids: from an archaean origin to phosphatidylinositol 3,5-bisphosphate  
479 faults in human disease. FEBS J. 2013;280(24):6281-94. doi: 10.1111/febs.12452. PubMed PMID:  
480 23902363.
- 481 14. Ikononov O, Sbrissa D, Shisheva A. Mammalian cell morphology and endocytic membrane  
482 homeostasis require enzymatically active phosphoinositide 5-kinase PIKfyve. J Biol Chem.  
483 2001;276(28):26141-7. doi: 10.1074/jbc.M101722200. PubMed PMID: 11285266.
- 484 15. Ikononov OC, Sbrissa D, Mlak K, Deeb R, Fligger J, Soans A, et al. Active PIKfyve associates  
485 with and promotes the membrane attachment of the late endosome-to-trans-Golgi network  
486 transport factor Rab9 effector p40. J Biol Chem. 2003;278(51):50863-71. doi:  
487 10.1074/jbc.M307260200. PubMed PMID: 14530284.
- 488 16. Rutherford AC, Traer C, Wassmer T, Pattni K, Bujny MV, Carlton JG, et al. The mammalian  
489 phosphatidylinositol 3-phosphate 5-kinase (PIKfyve) regulates endosome-to-TGN retrograde  
490 transport. J Cell Sci. 2006;119(Pt 19):3944-57. doi: 10.1242/jcs.03153. PubMed PMID: 16954148;  
491 PubMed Central PMCID: PMC1904490.

- 492 17. de Lartigue J, Polson H, Feldman M, Shokat K, Tooze SA, Urbán S, et al. PIKfyve Regulation  
493 of Endosome-Linked Pathways. *Traffic*. 2009;10(7):883-93. doi: 10.1111/j.1600-0854.2009.00915.x.
- 494 18. Martin S, Harper CB, May LM, Coulson EJ, Meunier FA, Osborne SL. Inhibition of PIKfyve by  
495 YM-201636 dysregulates autophagy and leads to apoptosis-independent neuronal cell death. *PLoS*  
496 *One*. 2013;8(3):e60152. doi: 10.1371/journal.pone.0060152. PubMed PMID: 23544129; PubMed  
497 Central PMCID: PMC3609765.
- 498 19. Rusten T, Vaccari T, Lindmo K, Rodahl L, Nezis I, Sem-Jacobsen C, et al. ESCRTs and Fab1  
499 regulate distinct steps of autophagy. *Curr Biol*. 2007;17(20):1817-25. doi:  
500 10.1016/j.cub.2007.09.032. PubMed PMID: 17935992.
- 501 20. Tsuruta F, Green EM, Rousset M, Dolmetsch RE. PIKfyve regulates CaV1.2 degradation and  
502 prevents excitotoxic cell death. *J Cell Biol*. 2009;187(2):279-94. doi: 10.1083/jcb.200903028.  
503 PubMed PMID: 19841139; PubMed Central PMCID: PMC2768838.
- 504 21. Min SH, Suzuki A, Stalker TJ, Zhao L, Wang Y, McKennan C, et al. Loss of PIKfyve in platelets  
505 causes a lysosomal disease leading to inflammation and thrombosis in mice. *Nat Commun*.  
506 2014;5:4691. doi: 10.1038/ncomms5691. PubMed PMID: 25178411; PubMed Central PMCID:  
507 PMCPMC4369914.
- 508 22. Zhang X, Chow CY, Sahenk Z, Shy ME, Meisler MH, Li J. Mutation of FIG4 causes a rapidly  
509 progressive, asymmetric neuronal degeneration. *Brain : a journal of neurology*. 2008;131(Pt 8):1990-  
510 2001. doi: 10.1093/brain/awn114. PubMed PMID: 18556664; PubMed Central PMCID: PMC2724900.
- 511 23. Zhang Y, McCartney AJ, Zolov SN, Ferguson CJ, Meisler MH, Sutton MA, et al. Modulation of  
512 synaptic function by VAC14, a protein that regulates the phosphoinositides PI(3,5)P(2) and PI(5)P.  
513 *EMBO J*. 2012;31(16):3442-56. doi: 10.1038/emboj.2012.200. PubMed PMID: 22842785; PubMed  
514 Central PMCID: PMC3419932.
- 515 24. Zhang Y, Zolov SN, Chow CY, Slutsky SG, Richardson SC, Piper RC, et al. Loss of Vac14, a  
516 regulator of the signaling lipid phosphatidylinositol 3,5-bisphosphate, results in neurodegeneration  
517 in mice. *Proc Natl Acad Sci U S A*. 2007;104(44):17518-23. doi: 10.1073/pnas.0702275104. PubMed  
518 PMID: 17956977; PubMed Central PMCID: PMC2077288.
- 519 25. Bohdanowicz M, Grinstein S. Role of phospholipids in endocytosis, phagocytosis, and  
520 macropinocytosis. *Physiological reviews*. 2013;93(1):69-106. doi: 10.1152/physrev.00002.2012.  
521 PubMed PMID: 23303906.
- 522 26. Ellson CD, Anderson KE, Morgan G, Chilvers ER, Lipp P, Stephens LR, et al.  
523 Phosphatidylinositol 3-phosphate is generated in phagosomal membranes. *Curr Biol*.  
524 2001;11(20):1631-5. PubMed PMID: 11676926.
- 525 27. Vieira OV, Botelho RJ, Rameh L, Brachmann SM, Matsuo T, Davidson HW, et al. Distinct roles  
526 of class I and class III phosphatidylinositol 3-kinases in phagosome formation and maturation. *J Cell*  
527 *Biol*. 2001;155(1):19-25. doi: 10.1083/jcb.200107069. PubMed PMID: 11581283; PubMed Central  
528 PMCID: PMCPMC2150784.
- 529 28. Fratti RA, Backer JM, Gruenberg J, Corvera S, Deretic V. Role of phosphatidylinositol 3-kinase  
530 and Rab5 effectors in phagosomal biogenesis and mycobacterial phagosome maturation arrest. *J Cell*  
531 *Biol*. 2001;154(3):631-44. doi: 10.1083/jcb.200106049. PubMed PMID: 11489920; PubMed Central  
532 PMCID: PMCPMC2196432.
- 533 29. Cai X, Xu Y, Cheung AK, Tomlinson RC, Alcazar-Roman A, Murphy L, et al. PIKfyve, a class III PI  
534 kinase, is the target of the small molecular IL-12/IL-23 inhibitor apilimod and a player in Toll-like  
535 receptor signaling. *Chem Biol*. 2013;20(7):912-21. doi: 10.1016/j.chembiol.2013.05.010. PubMed  
536 PMID: 23890009.
- 537 30. Ikonomov OC, Sbrissa D, Shisheva A. YM201636, an inhibitor of retroviral budding and  
538 PIKfyve-catalyzed PtdIns(3,5)P2 synthesis, halts glucose entry by insulin in adipocytes. *Biochem*  
539 *Biophys Res Commun*. 2009;382(3):566-70. doi: 10.1016/j.bbrc.2009.03.063. PubMed PMID:  
540 19289105; PubMed Central PMCID: PMC3910513.



- 541 31. Hazeki K, Nigorikawa K, Takaba Y, Segawa T, Nukuda A, Masuda A, et al. Essential roles of  
542 PIKfyve and PTEN on phagosomal phosphatidylinositol 3-phosphate dynamics. *FEBS Lett.*  
543 2012;586(22):4010-5. doi: 10.1016/j.febslet.2012.09.043. PubMed PMID: 23068606.
- 544 32. Kim GH, Dayam RM, Prashar A, Terebiznik M, Botelho RJ. PIKfyve Inhibition Interferes with  
545 Phagosome and Endosome Maturation in Macrophages. *Traffic.* 2014;15(10):1143-63. doi:  
546 10.1111/tra.12199. PubMed PMID: 25041080.
- 547 33. Clark J, Kay RR, Kielkowska A, Niewczas I, Fets L, Oxley D, et al. Dictyostelium uses ether-  
548 linked inositol phospholipids for intracellular signalling. *EMBO J.* 2014;33(19):2188-200. doi:  
549 10.15252/embj.201488677. PubMed PMID: 25180230; PubMed Central PMCID: PMC4282506.
- 550 34. Calvo-Garrido J, King JS, Munoz-Braceras S, Escalante R. Vmp1 regulates PtdIns3P signaling  
551 during autophagosome formation in Dictyostelium discoideum. *Traffic.* 2014;15(11):1235-46. doi:  
552 10.1111/tra.12210. PubMed PMID: 25131297.
- 553 35. King JS, Teo R, Ryves J, Reddy JV, Peters O, Orabi B, et al. The mood stabiliser lithium  
554 suppresses PIP3 signalling in Dictyostelium and human cells. *Dis Model Mech.* 2009;2(5-6):306-12.  
555 doi: 10.1242/dmm.001271. PubMed PMID: 19383941; PubMed Central PMCID: PMC2675811.
- 556 36. Kortholt A, King JS, Keizer-Gunnink I, Harwood AJ, Van Haastert PJ. Phospholipase C  
557 regulation of phosphatidylinositol 3,4,5-trisphosphate-mediated chemotaxis. *Mol Biol Cell.*  
558 2007;18(12):4772-9. doi: 10.1091/mbc.E07-05-0407. PubMed PMID: 17898079; PubMed Central  
559 PMCID: PMC2096598.
- 560 37. Dormann D, Weijer G, Dowler S, Weijer CJ. In vivo analysis of 3-phosphoinositide dynamics  
561 during Dictyostelium phagocytosis and chemotaxis. *J Cell Sci.* 2004;117(Pt 26):6497-509. doi:  
562 10.1242/jcs.01579. PubMed PMID: 15572406.
- 563 38. Nicot AS, Fares H, Payrastre B, Chisholm AD, Labouesse M, Laporte J. The phosphoinositide  
564 kinase PIKfyve/Fab1p regulates terminal lysosome maturation in *Caenorhabditis elegans*. *Molecular*  
565 *biology of the cell.* 2006;17(7):3062-74. PubMed PMID: WOS:000238721000018.
- 566 39. Smith EW, Lima WC, Charette SJ, Cosson P. Effect of starvation on the endocytic pathway in  
567 Dictyostelium cells. *Eukaryot Cell.* 2010;9(3):387-92. doi: 10.1128/EC.00285-09. PubMed PMID:  
568 20097741; PubMed Central PMCID: PMC2837978.
- 569 40. Veltman DM, Williams TD, Bloomfield G, Chen BC, Betzig E, Insall RH, et al. A plasma  
570 membrane template for macropinocytic cups. *eLife.* 2016;5. doi: 10.7554/eLife.20085. PubMed  
571 PMID: 27960076; PubMed Central PMCID: PMC45154761.
- 572 41. Clarke M, Maddera L, Engel U, Gerisch G. Retrieval of the vacuolar H-ATPase from  
573 phagosomes revealed by live cell imaging. *PLoS One.* 2010;5(1):e8585. doi:  
574 10.1371/journal.pone.0008585. PubMed PMID: 20052281; PubMed Central PMCID:  
575 PMC2796722.
- 576 42. Simonsen A, Lippe R, Christoforidis S, Gaullier JM, Brech A, Callaghan J, et al. EEA1 links  
577 PI(3)K function to Rab5 regulation of endosome fusion. *Nature.* 1998;394(6692):494-8. doi:  
578 10.1038/28879. PubMed PMID: 9697774.
- 579 43. Gillooly DJ, Morrow IC, Lindsay M, Gould R, Bryant NJ, Gaullier JM, et al. Localization of  
580 phosphatidylinositol 3-phosphate in yeast and mammalian cells. *Embo Journal.* 2000;19(17):4577-  
581 88. doi: 10.1093/emboj/19.17.4577. PubMed PMID: WOS:000089275600016.
- 582 44. Clarke M, Kohler J, Arana Q, Liu T, Heuser J, Gerisch G. Dynamics of the vacuolar H(+)-ATPase  
583 in the contractile vacuole complex and the endosomal pathway of Dictyostelium cells. *J Cell Sci.*  
584 2002;115(Pt 14):2893-905. PubMed PMID: 12082150.
- 585 45. Gary JD, Wurmser AE, Bonangelino CJ, Weisman LS, Emr SD. Fab1p is essential for PtdIns(3)P  
586 5-kinase activity and the maintenance of vacuolar size and membrane homeostasis. *J Cell Biol.*  
587 1998;143(1):65-79. PubMed PMID: 9763421; PubMed Central PMCID: PMC2132800.
- 588 46. Jefferies HB, Cooke FT, Jat P, Boucheron C, Koizumi T, Hayakawa M, et al. A selective PIKfyve  
589 inhibitor blocks PtdIns(3,5)P(2) production and disrupts endomembrane transport and retroviral  
590 budding. *EMBO reports.* 2008;9(2):164-70. doi: 10.1038/sj.embor.7401155. PubMed PMID:  
591 18188180; PubMed Central PMCID: PMC2246419.

- 592 47. Kerr MC, Wang JT, Castro NA, Hamilton NA, Town L, Brown DL, et al. Inhibition of the PtdIns  
593 (5) kinase PIKfyve disrupts intracellular replication of Salmonella. *The EMBO journal*.  
594 2010;29(8):1331-47.
- 595 48. Bak G, Lee EJ, Lee Y, Kato M, Segami S, Sze H, et al. Rapid structural changes and acidification  
596 of guard cell vacuoles during stomatal closure require phosphatidylinositol 3,5-bisphosphate. *Plant*  
597 *Cell*. 2013;25(6):2202-16. doi: 10.1105/tpc.113.110411. PubMed PMID: 23757398; PubMed Central  
598 PMCID: PMC3723621.
- 599 49. Sattler N, Monroy R, Soldati T. Quantitative analysis of phagocytosis and phagosome  
600 maturation. *Methods in molecular biology*. 2013;983:383-402. doi: 10.1007/978-1-62703-302-2\_21.  
601 PubMed PMID: 23494319.
- 602 50. Li SC, Diakov TT, Xu T, Tarsio M, Zhu W, Couoh-Cardel S, et al. The signaling lipid PI(3,5)P(2)  
603 stabilizes V(1)-V(o) sector interactions and activates the V-ATPase. *Mol Biol Cell*. 2014;25(8):1251-62.  
604 doi: 10.1091/mbc.E13-10-0563. PubMed PMID: 24523285; PubMed Central PMCID:  
605 PMCPMC3982991.
- 606 51. Park L, Thomason PA, Zech T, King JS, Veltman DM, Carnell M, et al. Cyclical action of the  
607 WASH complex: FAM21 and capping protein drive WASH recycling, not initial recruitment. *Dev Cell*.  
608 2013;24(2):169-81. doi: 10.1016/j.devcel.2012.12.014. PubMed PMID: 23369714.
- 609 52. Leiba J, Sabra A, Bodinier R, Marchetti A, Lima WC, Melotti A, et al. Vps13F links bacterial  
610 recognition and intracellular killing in Dictyostelium. *Cell Microbiol*. 2017. doi: 10.1111/cmi.12722.  
611 PubMed PMID: 28076662.
- 612 53. Hilbi H, Hoffmann C, Harrison CF. Legionella spp. outdoors: colonization, communication and  
613 persistence. *Environ Microbiol Rep*. 2011;3(3):286-96. doi: 10.1111/j.1758-2229.2011.00247.x.  
614 PubMed PMID: 23761274.
- 615 54. Finsel I, Hilbi H. Formation of a pathogen vacuole according to Legionella pneumophila: how  
616 to kill one bird with many stones. *Cell Microbiol*. 2015;17(7):935-50. doi: 10.1111/cmi.12450.  
617 PubMed PMID: 25903720.
- 618 55. Ge J, Shao F. Manipulation of host vesicular trafficking and innate immune defence by  
619 Legionella Dot/Icm effectors. *Cell Microbiol*. 2011;13(12):1870-80. doi: 10.1111/j.1462-  
620 5822.2011.01710.x. PubMed PMID: 21981078.
- 621 56. Weber S, Wagner M, Hilbi H. Live-cell imaging of phosphoinositide dynamics and membrane  
622 architecture during Legionella infection. *MBio*. 2014;5(1):e00839-13. doi: 10.1128/mBio.00839-13.  
623 PubMed PMID: 24473127; PubMed Central PMCID: PMCPMC3903275.
- 624 57. Brombacher E, Urwyler S, Ragaz C, Weber SS, Kami K, Overduin M, et al. Rab1 guanine  
625 nucleotide exchange factor SidM is a major phosphatidylinositol 4-phosphate-binding effector  
626 protein of Legionella pneumophila. *J Biol Chem*. 2009;284(8):4846-56. doi:  
627 10.1074/jbc.M807505200. PubMed PMID: 19095644; PubMed Central PMCID: PMC2643517.
- 628 58. Hilbi H, Weber S, Finsel I. Anchors for effectors: subversion of phosphoinositide lipids by  
629 legionella. *Front Microbiol*. 2011;2:91. doi: 10.3389/fmicb.2011.00091. PubMed PMID: 21833330;  
630 PubMed Central PMCID: PMC3153050.
- 631 59. Jank T, Bohmer KE, Tzivelekidis T, Schwan C, Belyi Y, Aktories K. Domain organization of  
632 Legionella effector SetA. *Cell Microbiol*. 2012;14(6):852-68. doi: 10.1111/j.1462-5822.2012.01761.x.  
633 PubMed PMID: 22288428.
- 634 60. Finsel I, Ragaz C, Hoffmann C, Harrison CF, Weber S, van Rahden VA, et al. The Legionella  
635 effector RidL inhibits retrograde trafficking to promote intracellular replication. *Cell Host Microbe*.  
636 2013;14(1):38-50. doi: 10.1016/j.chom.2013.06.001. PubMed PMID: 23870312.
- 637 61. Harding CR, Mattheis C, Mousnier A, Oates CV, Hartland EL, Frankel G, et al. LtpD Is a Novel  
638 Legionella pneumophila Effector That Binds Phosphatidylinositol 3-Phosphate and Inositol  
639 Monophosphatase IMPA1. *Infection and Immunity*. 2013;81(11):4261-70. doi: 10.1128/iai.01054-13.  
640 PubMed PMID: WOS:000325719900031.



- 641 62. Weber SS, Ragaz C, Reus K, Nyfeler Y, Hilbi H. Legionella pneumophila exploits PI(4)P to  
642 anchor secreted effector proteins to the replicative vacuole. *Plos Pathogens*. 2006;2(5):418-30. doi:  
643 ARTN e46  
10.1371/journal.ppat.0020046. PubMed PMID: WOS:000202894500009.
- 644 63. Dolinsky S, Haneburger I, Cichy A, Hannemann M, Itzen A, Hilbi H. The Legionella  
645 longbeachae Icm/Dot substrate SidC selectively binds phosphatidylinositol 4-phosphate with  
646 nanomolar affinity and promotes pathogen vacuole-endoplasmic reticulum interactions. *Infect*  
647 *Immun*. 2014;82(10):4021-33. doi: 10.1128/IAI.01685-14. PubMed PMID: 25024371; PubMed  
648 Central PMCID: PMCPMC4187854.
- 649 64. Segal G, Shuman HA. Intracellular multiplication and human macrophage killing by Legionella  
650 pneumophila are inhibited by conjugal components of IncQ plasmid RSF1010. *Molecular*  
651 *Microbiology*. 1998;30(1):197-208. doi: 10.1046/j.1365-2958.1998.01054.x. PubMed PMID:  
652 WOS:000076538500017.
- 653 65. Hilbi H, Segal G, Shuman HA. Icm/dot-dependent upregulation of phagocytosis by Legionella  
654 pneumophila. *Mol Microbiol*. 2001;42(3):603-17. PubMed PMID: 11722729.
- 655 66. Rizopoulos Z, Balistreri G, Kilcher S, Martin CK, Syedbasha M, Helenius A, et al. Vaccinia Virus  
656 Infection Requires Maturation of Macropinosomes. *Traffic*. 2015;16(8):814-31. doi:  
657 10.1111/tra.12290. PubMed PMID: 25869659; PubMed Central PMCID: PMCPMC4973667.
- 658 67. Krishna S, Palm W, Lee Y, Yang W, Bandyopadhyay U, Xu H, et al. PIKfyve Regulates Vacuole  
659 Maturation and Nutrient Recovery following Engulfment. *Dev Cell*. 2016;38(5):536-47. doi:  
660 10.1016/j.devcel.2016.08.001. PubMed PMID: 27623384; PubMed Central PMCID:  
661 PMCPMC5046836.
- 662 68. Ho CY, Choy CH, Wattson CA, Johnson DE, Botelho RJ. The Fab1/PIKfyve Phosphoinositide  
663 Phosphate Kinase Is Not Necessary to Maintain the pH of Lysosomes and of the Yeast Vacuole. *J Biol*  
664 *Chem*. 2015;290(15):9919-28. doi: 10.1074/jbc.M114.613984. PubMed PMID: 25713145.
- 665 69. Dong XP, Shen D, Wang X, Dawson T, Li X, Zhang Q, et al. PI(3,5)P(2) controls membrane  
666 trafficking by direct activation of mucolipin Ca(2+) release channels in the endolysosome. *Nat*  
667 *Commun*. 2010;1:38. doi: 10.1038/ncomms1037. PubMed PMID: 20802798; PubMed Central PMCID:  
668 PMCPMC2928581.
- 669 70. Dayam RM, Saric A, Shilliday RE, Botelho RJ. The Phosphoinositide-Gated Lysosomal Ca(2+)  
670 Channel, TRPML1, Is Required for Phagosome Maturation. *Traffic*. 2015;16(9):1010-26. doi:  
671 10.1111/tra.12303. PubMed PMID: 26010303.
- 672 71. Li X, Rydzewski N, Hider A, Zhang X, Yang J, Wang W, et al. A molecular mechanism to  
673 regulate lysosome motility for lysosome positioning and tubulation. *Nat Cell Biol*. 2016;18(4):404-17.  
674 doi: 10.1038/ncb3324. PubMed PMID: 26950892.
- 675 72. Lima WC, Leuba F, Soldati T, Cosson P. Mucolipin controls lysosome exocytosis in  
676 Dictyostelium. *J Cell Sci*. 2012;125(Pt 9):2315-22. doi: 10.1242/jcs.100362. PubMed PMID: 22357942.
- 677 73. Horwitz MA. THE LEGIONNAIRES-DISEASE BACTERIUM (LEGIONELLA-PNEUMOPHILA)  
678 INHIBITS PHAGOSOME-LYSOSOME FUSION IN HUMAN-MONOCYTES. *Journal of Experimental*  
679 *Medicine*. 1983;158(6):2108-26. doi: 10.1084/jem.158.6.2108. PubMed PMID:  
680 WOS:A1983RV00200023.
- 681 74. Lamothe J, Huynh KK, Grinstein S, Valvano MA. Intracellular survival of Burkholderia  
682 cenocepacia in macrophages is associated with a delay in the maturation of bacteria-containing  
683 vacuoles. *Cell Microbiol*. 2007;9(1):40-53. doi: 10.1111/j.1462-5822.2006.00766.x. PubMed PMID:  
684 16869828.
- 685 75. Smith LM, Dixon EF, May RC. The fungal pathogen *Cryptococcus neoformans* manipulates  
686 macrophage phagosome maturation. *Cell Microbiol*. 2015;17(5):702-13. doi: 10.1111/cmi.12394.  
687 PubMed PMID: 25394938.
- 688 76. Segal G, Shuman HA. Legionella pneumophila utilizes the same genes to multiply within  
689 *Acanthamoeba castellanii* and human macrophages. *Infection and Immunity*. 1999;67(5):2117-24.  
690 PubMed PMID: WOS:000079909300010.
- 691

- 692 77. Steenbergen JN, Shuman HA, Casadevall A. *Cryptococcus neoformans* interactions with  
693 amoebae suggest an explanation for its virulence and intracellular pathogenic strategy in  
694 macrophages. *Proc Natl Acad Sci U S A*. 2001;98(26):15245-50. doi: 10.1073/pnas.261418798.  
695 PubMed PMID: 11742090; PubMed Central PMCID: PMC65014.
- 696 78. Hasselbring BM, Patel MK, Schell MA. *Dictyostelium discoideum* as a model system for  
697 identification of *Burkholderia pseudomallei* virulence factors. *Infect Immun*. 2011;79(5):2079-88.  
698 doi: 10.1128/IAI.01233-10. PubMed PMID: 21402765; PubMed Central PMCID: PMC3088138.
- 699 79. Hubber A, Roy CR. Modulation of host cell function by *Legionella pneumophila* type IV  
700 effectors. *Annu Rev Cell Dev Biol*. 2010;26:261-83. doi: 10.1146/annurev-cellbio-100109-104034.  
701 PubMed PMID: 20929312.
- 702 80. Isberg RR, O'Connor TJ, Heidtman M. The *Legionella pneumophila* replication vacuole:  
703 making a cosy niche inside host cells. *Nature Reviews Microbiology*. 2009;7(1):12-24. doi:  
704 10.1038/nrmicro1967. PubMed PMID: WOS:000262110300009.
- 705 81. Froquet R, Lelong E, Marchetti A, Cosson P. *Dictyostelium discoideum*: a model host to  
706 measure bacterial virulence. *Nature Protocols*. 2009;4(1):25-30. doi: 10.1038/nprot.2008.212.  
707 PubMed PMID: WOS:000265781800003.
- 708 82. Wilkins A, Khosla M, Fraser DJ, Spiegelman GB, Fisher PR, Weeks G, et al. *Dictyostelium* RasD  
709 is required for normal phototaxis, but not differentiation. *Genes Dev*. 2000;14(11):1407-13. PubMed  
710 PMID: 10837033; PubMed Central PMCID: PMCPMC316659.
- 711 83. Sutoh K. A transformation vector for *dictyostelium discoideum* with a new selectable marker  
712 bsr. *Plasmid*. 1993;30(2):150-4. doi: 10.1006/plas.1993.1042. PubMed PMID: 8234487.
- 713 84. Veltman DM, Lemieux MG, Knecht DA, Insall RH. PIP(3)-dependent macropinocytosis is  
714 incompatible with chemotaxis. *J Cell Biol*. 2014;204(4):497-505. doi: 10.1083/jcb.201309081.  
715 PubMed PMID: 24535823; PubMed Central PMCID: PMCPMC3926956.
- 716 85. Carnell M, Zech T, Calaminus SD, Ura S, Hagedorn M, Johnston SA, et al. Actin polymerization  
717 driven by WASH causes V-ATPase retrieval and vesicle neutralization before exocytosis. *J Cell Biol*.  
718 2011;193(5):831-9. doi: 10.1083/jcb.201009119. PubMed PMID: 21606208; PubMed Central PMCID:  
719 PMC3105540.
- 720 86. King J, Insall RH. Parasexual genetics of *Dictyostelium* gene disruptions: identification of a ras  
721 pathway using diploids. *Bmc Genetics*. 2003;4. doi: 10.1186/1471-2156-4-12. PubMed PMID:  
722 WOS:000184659500001.
- 723 87. Arafah S, Kicka S, Trofimov V, Hagedorn M, Andreu N, Wiles S, et al. Setting up and  
724 monitoring an infection of *Dictyostelium discoideum* with mycobacteria. *Methods Mol Biol*.  
725 2013;983:403-17. doi: 10.1007/978-1-62703-302-2\_22. PubMed PMID: 23494320.
- 726 88. Davidson AJ, King JS, Insall RH. The use of streptavidin conjugates as immunoblot loading  
727 controls and mitochondrial markers for use with *Dictyostelium discoideum*. *Biotechniques*.  
728 2013;55(1):39-41. doi: 10.2144/000114054. PubMed PMID: 23834384.
- 729 89. Sadosky AB, Wiater LA, Shuman HA. Identification of *Legionella pneumophila* genes required  
730 for growth within and killing of human macrophages. *Infect Immun*. 1993;61(12):5361-73. PubMed  
731 PMID: 8225610; PubMed Central PMCID: PMCPMC281323.
- 732 90. Feeley JC, Gibson RJ, Gorman GW, Langford NC, Rasheed JK, Mackel DC, et al. Charcoal-yeast  
733 extract agar: primary isolation medium for *Legionella pneumophila*. *J Clin Microbiol*. 1979;10(4):437-  
734 41. PubMed PMID: 393713; PubMed Central PMCID: PMCPMC273193.
- 735 91. Solomon JM, Rupper A, Cardelli JA, Isberg RR. Intracellular growth of *Legionella pneumophila*  
736 in *Dictyostelium discoideum*, a system for genetic analysis of host-pathogen interactions. *Infect*  
737 *Immun*. 2000;68(5):2939-47. PubMed PMID: 10768992; PubMed Central PMCID: PMCPMC97507.

738

739

## 740 [Figure Legends](#)

### 741 [Figure 1](#)

742 **Knockout or inhibition of PIKfyve leads to a swollen vesicle phenotype.** (A) DIC images of Ax3, two  
743 independent *PIKfyve*-null clones and a random integrant in HL5 medium. Arrows indicate the  
744 enlarged vesicles. (B) Swollen vesicles in *PIKfyve*-null cells became more apparent after incubation  
745 for the time indicated in the low osmolarity starvation buffer (KK2), but were lost as cells entered  
746 differentiation. (C) Induction of swollen vesicles with 5  $\mu$ M apilimod, a PIKfyve-specific inhibitor.  
747 Images taken in HL5 medium after 5 hours of treatment.

### 748 [Figure 2](#)

749 ***PIKfyve* null cells have growth defects.** *PIKfyve*<sup>-</sup> null cells had no defects in either (A) endocytosis or  
750 (B) exocytosis, as measured by uptake or loss of FITC dextran. Data shown are mean +/- SD. (C)  
751 Despite normal uptake, *PIKfyve*-null cells had a longer generation time than Ax3 cells when growing  
752 axenically in liquid culture, data shown are mean +/- SD. (D) *PIKfyve*-null cells grew markedly more  
753 slowly on lawns of *Klebsiella pneumoniae* than either Ax3 or a random integrant. (E) Growth on  
754 bacteria is also defective for *PIKfyve*-null cells in the Ax2 genetic background and across multiple  
755 bacterial strains. Growth was assessed by plating serial dilutions of amoebae on lawns of different  
756 bacteria and dark patches indicate amoebae growth. Data for all bacteria are summarised in (F).

### 757 [Figure 3](#)

758 **Phagocytic uptake is not dependent on PIKfyve.** (A) There was no defect in the ability of *PIKfyve*-null  
759 cells to reduce the turbidity of a suspension of *E. coli* over time. (B) Uptake of 1  $\mu$ m beads or (C) GFP-  
760 expressing *Mycobacterium smegmatis* was also not affected by absence of PIKfyve, as measured by  
761 flow cytometry. Data shown are means +/- SD.

### 762 [Figure 4](#)

763 **PIKfyve is important for acidification and proteolysis.** (A) PI(3)P dynamics are not altered by  
764 absence of PIKfyve. PI(3)P was monitored by visualising the recruitment of a GFP-2xFYVE probe to  
765 phagosomes following uptake of 3  $\mu$ m beads (asterisks) by confocal time-lapse microscopy. (B) Time  
766 that GFP-2xFYVE stays associated with phagosomes following engulfment, indicating that PI(3)P  
767 removal is not PIKfyve-dependent. n indicates the total number of cells quantified in 3 independent  
768 experiments. (C) Phagosomal acidification and (D) proteolysis are severely disrupted in *PIKfyve* null  
769 cells, measured using 3  $\mu$ m beads coupled to acidification or proteolysis reporters. Data shown are  
770 mean +/- SD.

771 **Figure 5**

772 **PIKfyve is required for efficient V-ATPase recruitment.** Recruitment of (A) the V-ATPase V<sub>0</sub> subunit  
773 GFP-VatM and (B) the V<sub>1</sub> peripheral subunit VatB-GFP to phagocytosed pHrodo-labelled yeast  
774 visualised by confocal time-lapse imaging. (C) Quantification of GFP-VatM recruitment over time,  
775 indicating reduced recruitment in *PIKfyve*-null mutants. (D) Quantification of VatB-GFP recruitment,  
776 following the same pattern. (E) Quantification of increase in yeast-associated pHrodo fluorescence,  
777 indicating acidification. The fluorescence increases significantly more in Ax2 cells than in *PIKfyve*-null  
778 cells. Data shown are mean +/- SEM, p values calculated by Student's t-test.

779 **Figure 6**

780 **Bacterial survival is increased in *PIKfyve* null cells.** (A) Kaplan-Meyer survival graph, with survival  
781 indicated by persistent fluorescence of phagocytosed GFP-expressing *Klebsiella pneumoniae*.  
782 Bacteria survived for significantly longer in *PIKfyve*-null cells than in Ax2 (p<0.0001 as determined by  
783 Mantel-Cox test). 60 bacteria were followed across three independent experiments. (B) Stills from  
784 the widefield time-lapse movies quantified in (A). Arrows indicate phagocytosed bacteria

785 **Figure 7**

786 **PIKfyve is required to suppress *Legionella* replication.** (A) Uptake of GFP-producing wild-type (JR32)  
787 or avirulent ( $\Delta icmT$ ) *L. pneumophila* by *Dictyostelium* cells (MOI 100), analyzed by flow cytometry.  
788 Wild-type *L. pneumophila* show a higher infectivity than the avirulent strain both in Ax3 and in  
789 *PIKfyve*<sup>-</sup> *Dictyostelium*. (B) Intracellular growth and/or killing of *L. pneumophila* analyzed by colony  
790 forming units (CFU): *Dictyostelium* was infected with *L. pneumophila* wild-type (at an MOI of 1) or  
791  $\Delta icmT$  (MOI 100). In the course of multiple infection rounds (release and re-infection), more wild-  
792 type *L. pneumophila* accumulated in the medium surrounding *PIKfyve*<sup>-</sup> cells than wild-type. in  
793 contrast,  $\Delta icmT$  mutant bacteria were killed by both *Dictyostelium* strains. (C) *Dictyostelium* were  
794 infected with *L. pneumophila* wild-type (MOI 1) or  $\Delta icmT$  (MOI 100), lysed and intracellular CFU  
795 determined. Wild-type *L. pneumophila* grew significantly better in *PIKfyve*<sup>-</sup> cells than Ax3. (D)  
796 Analysis of intracellular growth of GFP-expressing *L. pneumophila* wild-type JR32 (MOI 1) or  $\Delta icmT$   
797 (MOI 100) by flow cytometry. Virulent *L. pneumophila* replicate more efficiently in *PIKfyve*<sup>-</sup>  
798 *Dictyostelium*, as indicated by the increasing proportions of amoebae containing high levels of GFP  
799 over time. Data represent means and standard deviation of duplicates (A; 10,000 counts each; n.s.,  
800 not significant) or triplicates (B, C; \*\*, P < 0.01) and are representative of 2-3 independent  
801 experiments.

802 **Supplementary Figure 1**

803 **PIKfyve gene disruption.** (A) Schematic representation of *Dictyostelium* PIKfyve indicating the site  
804 where the blasticidin resistance cassette was inserted into the gene to generate knockouts.

805 **Supplementary Figure 2**

806 **PIKfyve is not required for development.** *PIKfyve*<sup>-</sup> cells formed (A) morphologically normal fruiting  
807 bodies as well as (B) normal spores.

808 **Supplementary Figure 3**

809 **VatM expression has a dominant negative effect on acidification.** (A) VatB-GFP expression in Ax2  
810 and *PIKfyve*<sup>-</sup> cells suppressed acidification as measured by increase in pHrodo fluorescence,  
811 compared to the increase in fluorescence in cells expressing GFP-VatM. (B) Western blot of cells  
812 expressing VatB-GFP or GFP-VatM. There was no difference in expression levels between Ax2 and  
813 *PIKfyve*<sup>-</sup> cells for either reporter. However, VatB-GFP was expressed at a much higher level than GFP-  
814 VatM. Loading control is the mitochondrial protein MCCC1, recognised by Alexa680-conjugated  
815 streptavidin.



**A**

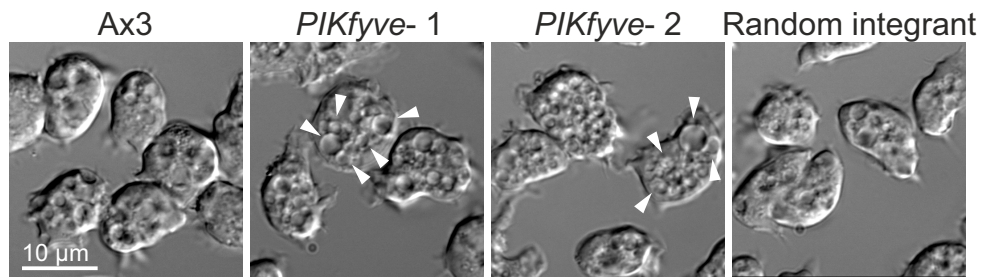

**B**

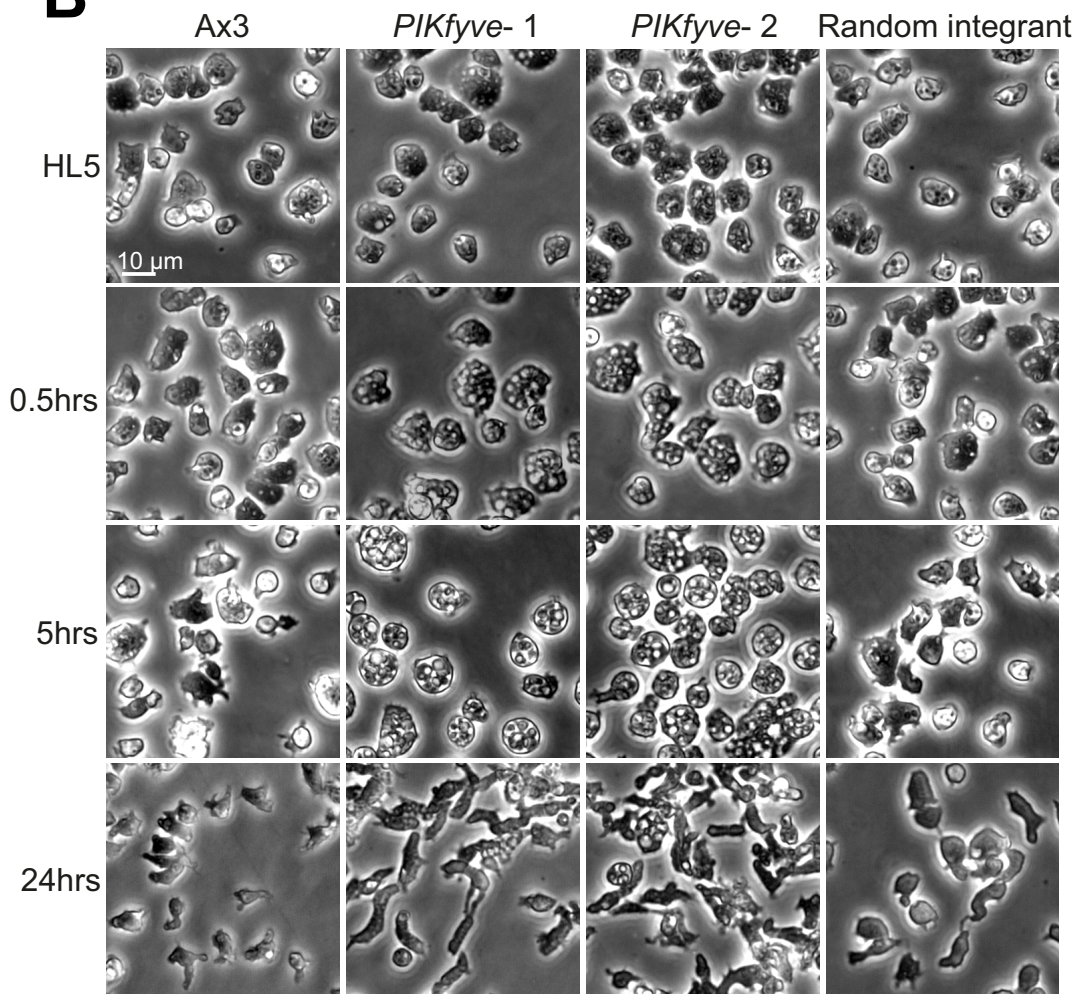

**C**

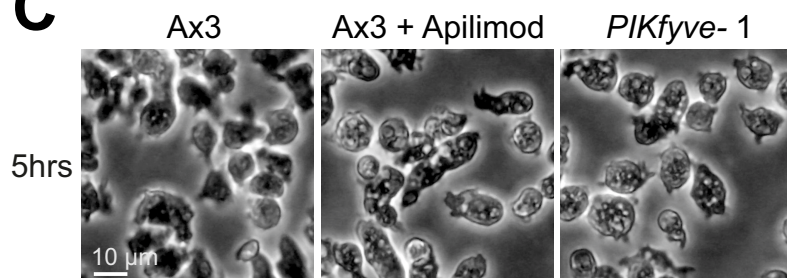

**Figure 1: KO or inhibition of PIKfyve leads to a swollen vesicle phenotype**

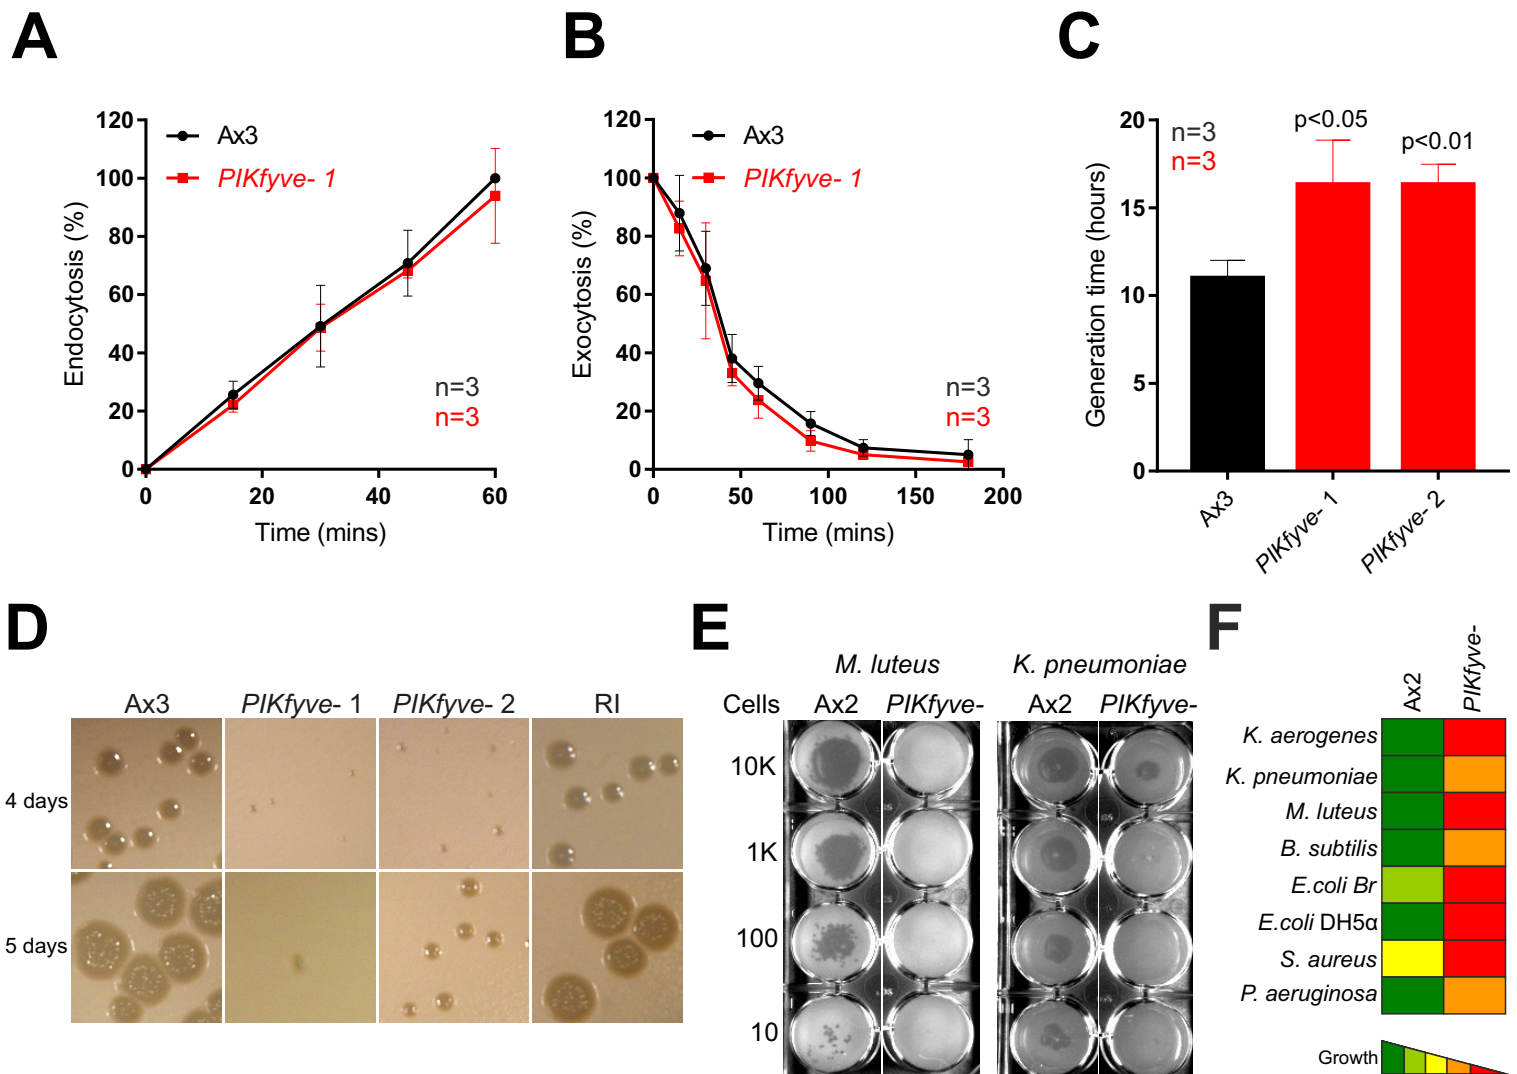

**Figure 2: *PIKfyve-* cells have growth defects**

**A**

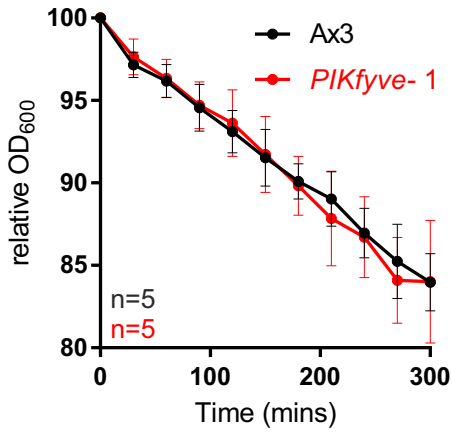

**B**

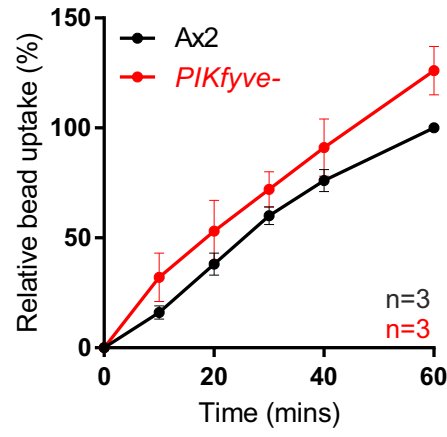

**C**

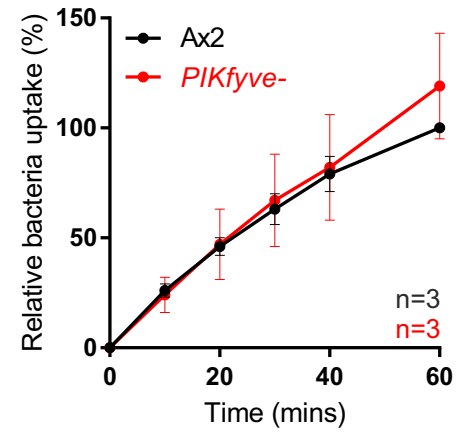

**Figure 3: PIKfyve is not required for phagocytic uptake**



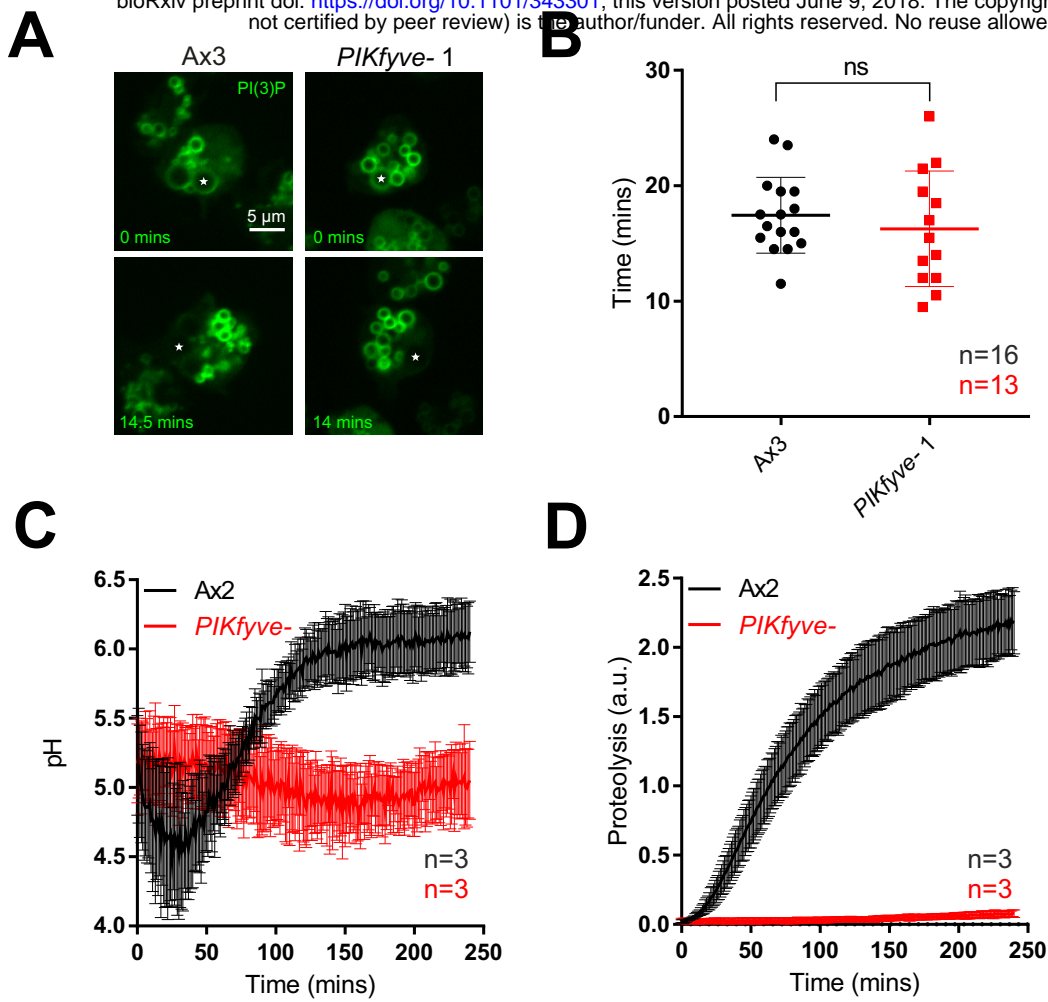

**Figure 4: PIKfyve is important for phagosome acidification and proteolysis**

**A**

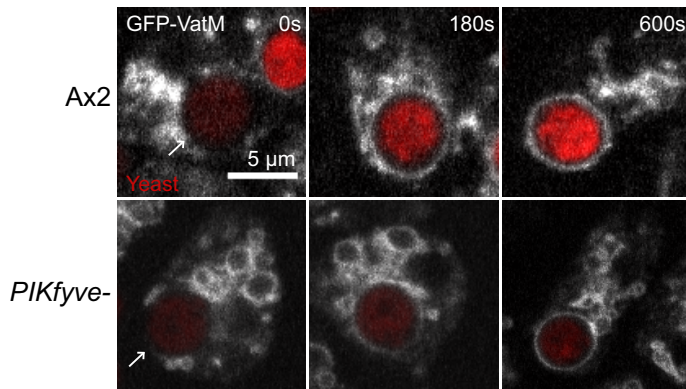

**B**

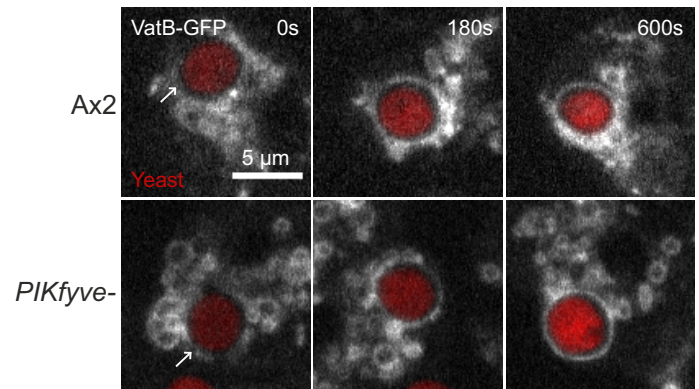

**C**

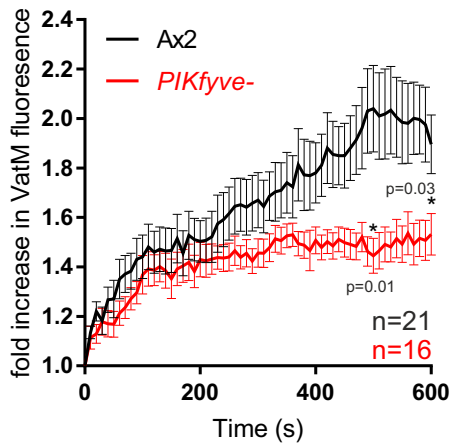

**D**

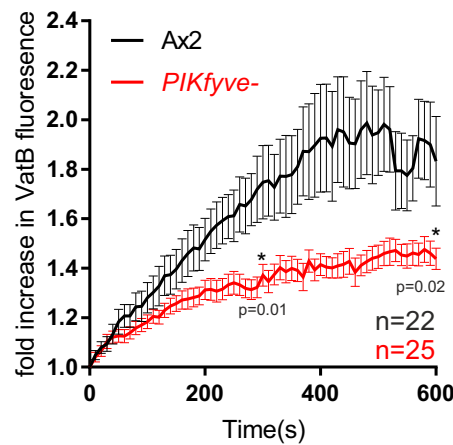

**E**

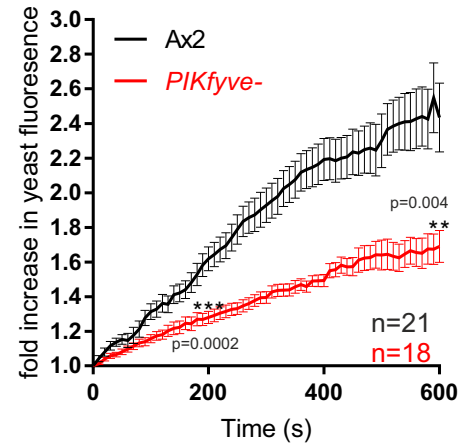

## Figure 5: PIKfyve is required for efficient V-ATPase recruitment

**A**

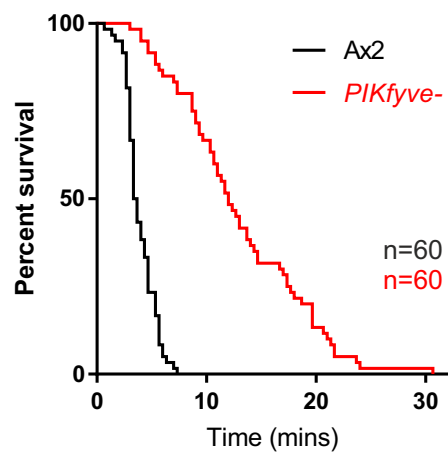

**B**

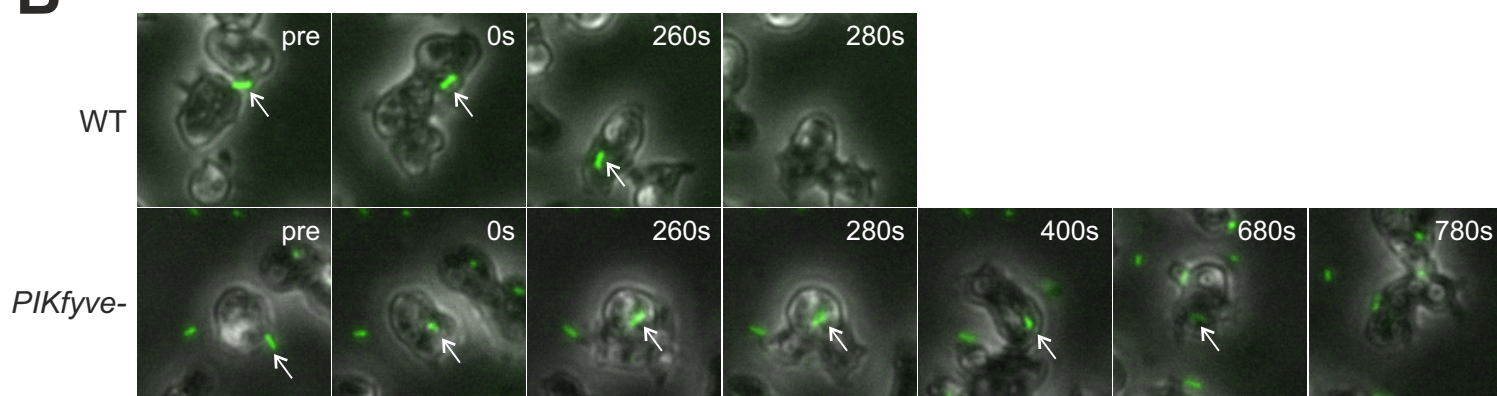

**Figure 6: Bacterial survival is increased in *PIKfyve*<sup>-</sup> cells**

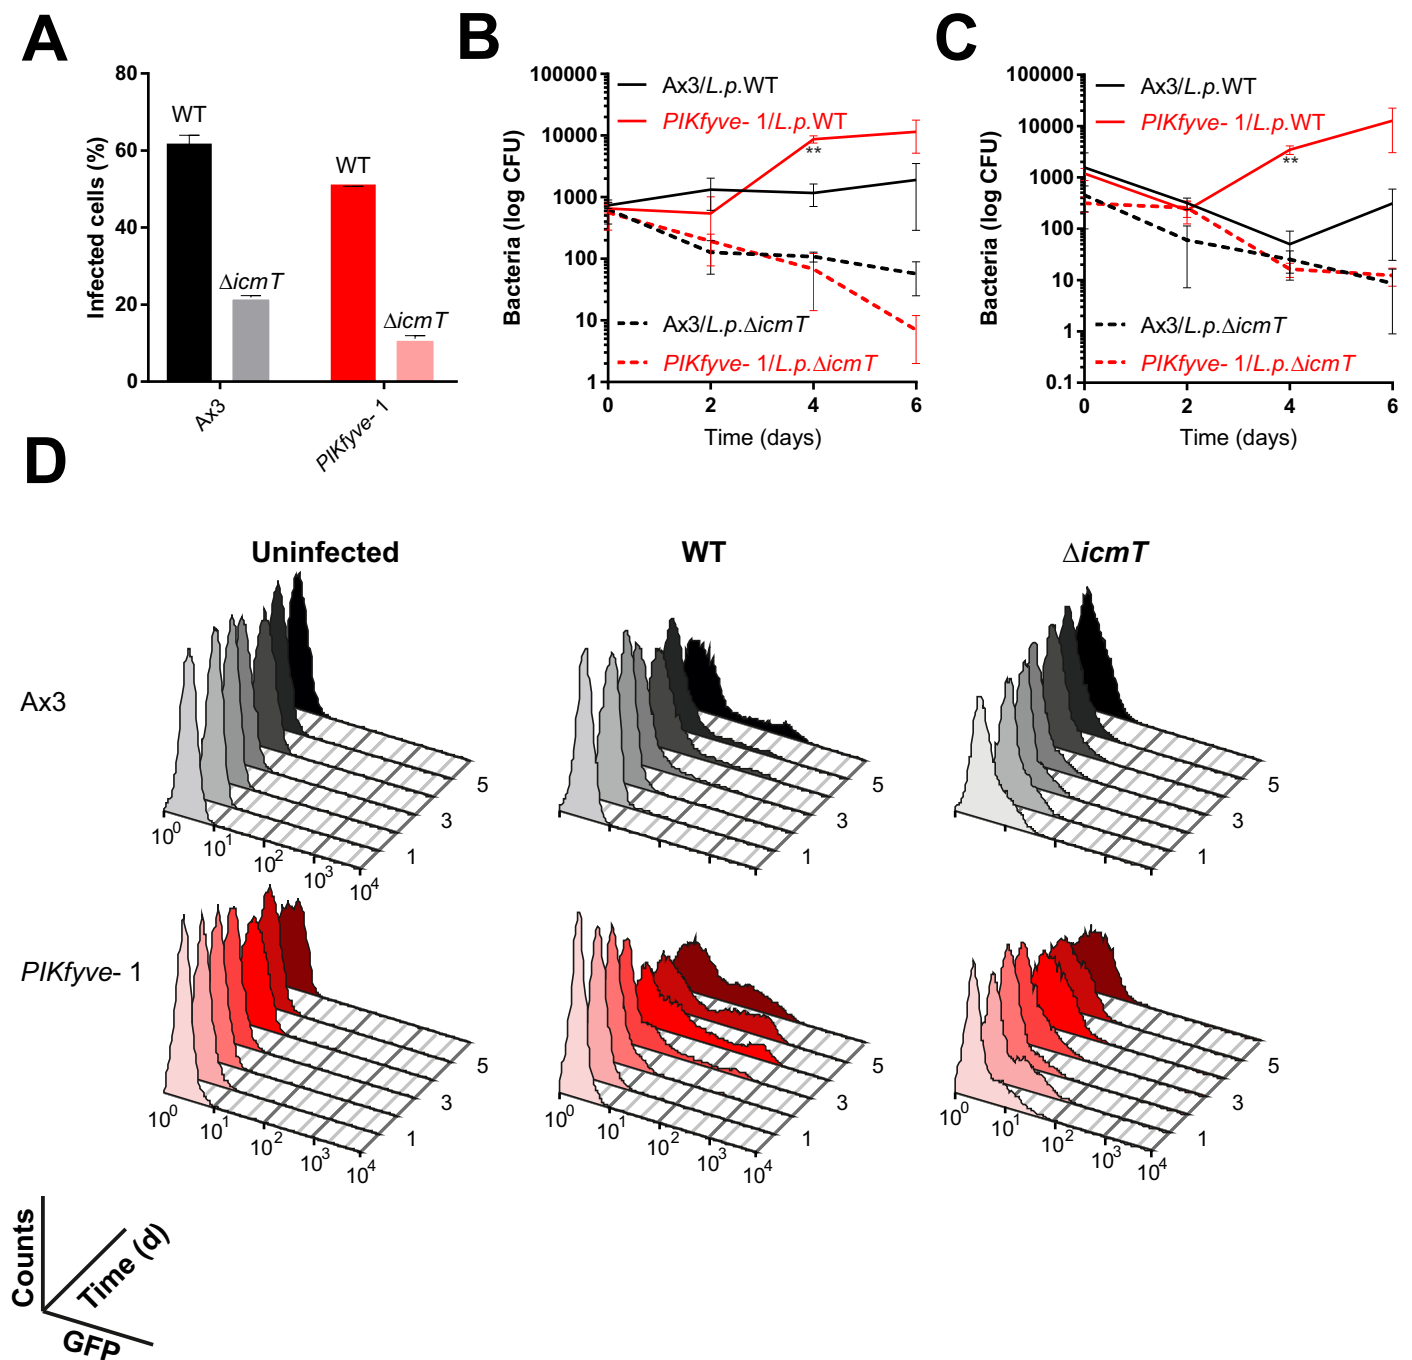

**Figure 7: PIKfyve is required to suppress legionella replication**

**A**

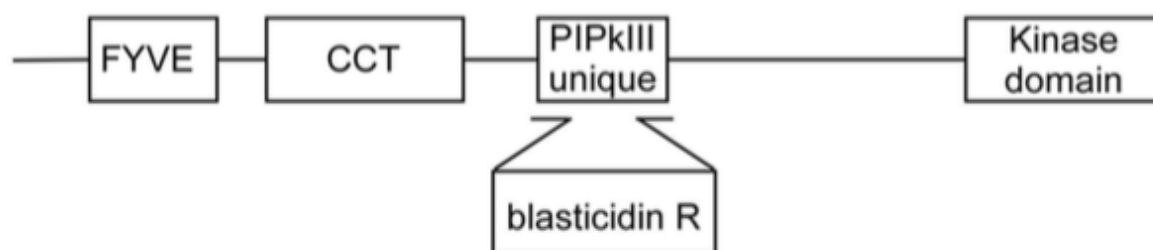

## Supplementary figure 1: PIKfyve gene disruption

**A**

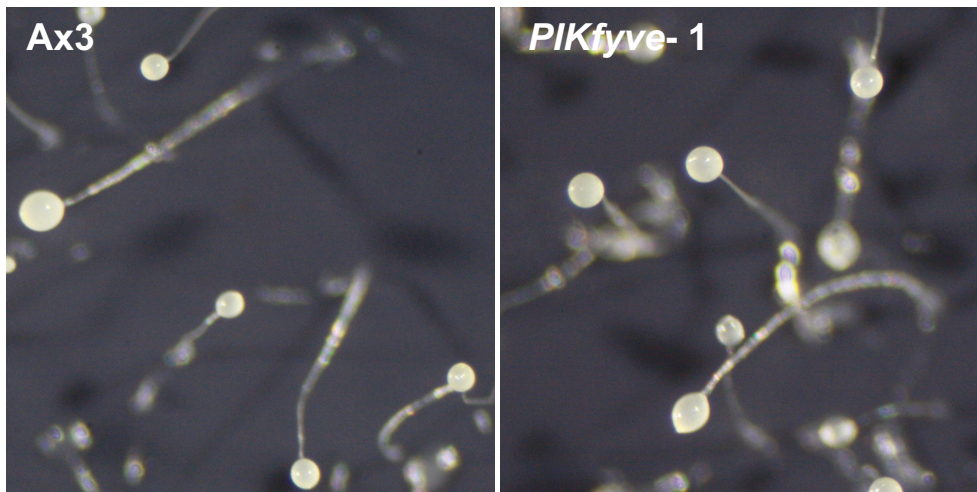

**B**

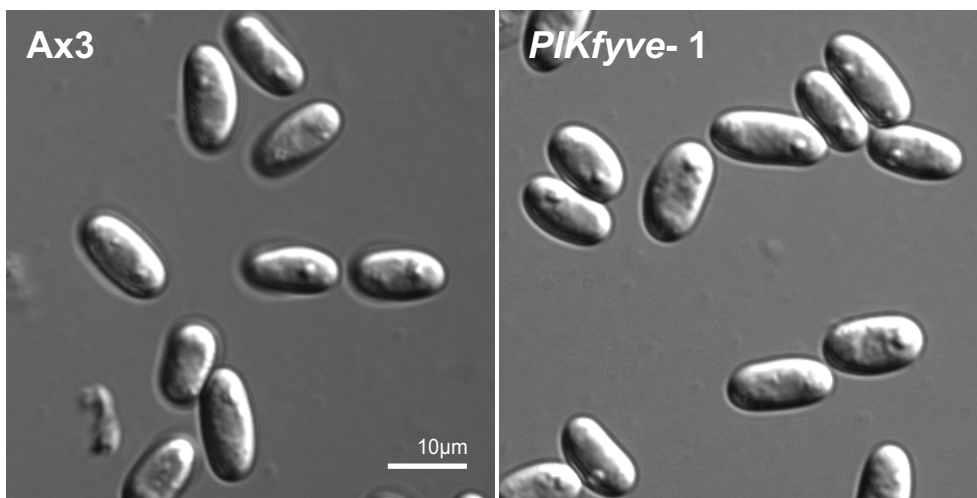

**Supplementary figure 2: PIKfyve is not required for development**

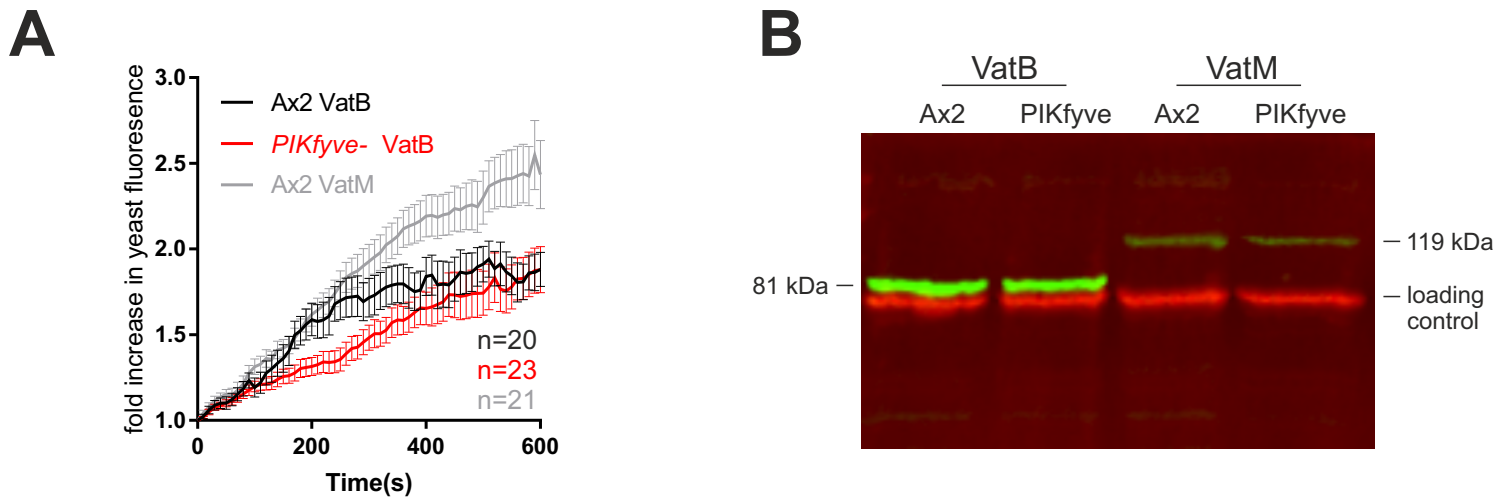

## Supplementary figure 3: VatB expression has a dominant negative effect on acidification
